# Supplementary material for: Ozone air pollution and ischaemic stroke occurrence: a case-crossover study in Nice, France
Source: PubMed Central journal article supplement — BMJ Open. 2013 Dec 5;3(12):e004060. doi: 10.1136/bmjopen-2013-004060 (PMC3855570; doi:10.1136/bmjopen-2013-004060), 2013-12-05
Supplement: bmjopen-2013-004060.draft_revisions.pdf [file bmjopen-2013-004060.draft_revisions.pdf]

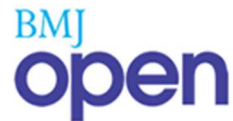

**Ozone air pollution and ischemic stroke occurrence:  
identification of a population at risk.**

|                                    |                                                                                                                                                                                                                                                                                                                                                                        |
|------------------------------------|------------------------------------------------------------------------------------------------------------------------------------------------------------------------------------------------------------------------------------------------------------------------------------------------------------------------------------------------------------------------|
| Journal:                           | <i>BMJ Open</i>                                                                                                                                                                                                                                                                                                                                                        |
| Manuscript ID:                     | bmjopen-2013-004060                                                                                                                                                                                                                                                                                                                                                    |
| Article Type:                      | Research                                                                                                                                                                                                                                                                                                                                                               |
| Date Submitted by the Author:      | 18-Sep-2013                                                                                                                                                                                                                                                                                                                                                            |
| Complete List of Authors:          | SUISSA, Laurent; University Hospital of Nice, Stroke Unit<br>FORTIER, Mikael; University Hospital of Nice, Department of Emergency<br>Medecine<br>LACHAUD, Sylvain; University Hospital of Nice, Stroke Unit<br>STACCINI, Pascal; University Hospital of Nice, Department of Medical<br>Information<br>MAHAGNE, Marie-Hélène; University Hospital of Nice, Stroke Unit |
| <b>Primary Subject<br>Heading</b>: | Occupational and environmental medicine                                                                                                                                                                                                                                                                                                                                |
| Secondary Subject Heading:         | Epidemiology, Neurology, Public health                                                                                                                                                                                                                                                                                                                                 |
| Keywords:                          | Epidemiology < TROPICAL MEDICINE, Stroke < NEUROLOGY, PUBLIC<br>HEALTH                                                                                                                                                                                                                                                                                                 |
|                                    |                                                                                                                                                                                                                                                                                                                                                                        |

SCHOLARONE™  
Manuscripts

1  
2  
3 **Title page**  
4

5  
6 **Ozone air pollution and ischemic stroke occurrence: identification of a population at**  
7  
8 **risk.**  
9

10  
11 SUISSA Laurent<sup>1</sup>, MD ; FORTIER Mikael<sup>2</sup>, MD ; LACHAUD Sylvain<sup>1</sup>, MD ; STACCINI  
12  
13 Pascal<sup>3</sup>, MD, PhD ; MAHAGNE Marie-Hélène<sup>1</sup>, MD, PhD.  
14

15  
16 <sup>1</sup> Stroke Center - University Hospital of Nice – Nice, France.  
17

18  
19 <sup>2</sup> Department of Emergency Medecine – University Hospital of Nice – Nice, France.  
20

21  
22 <sup>3</sup> Department of Medical Information – University Hospital of Nice – Nice, France.  
23  
24

25 **Corresponding author and address for reprints:**  
26

27  
28 Dr SUISSA Laurent - Hospital Saint-Roch – Unité Neurovasculaire - 5, rue Pierre Devoluy –  
29  
30 06000 NICE – France.  
31

32  
33 Phone : 0033492032720 – Fax : 0033492032721 – Mail : [suissa.laurent@free.fr](mailto:suissa.laurent@free.fr)  
34  
35

36  
37 **Cover title:** Ozone air pollution and ischemic stroke occurrence  
38

39  
40 **Keywords:** Ischemic stroke; Outdoor air pollution; Ozone; Vascular risk factors.  
41

42  
43 **Words count:** 2000  
44  
45  
46  
47  
48  
49  
50  
51  
52  
53  
54  
55  
56  
57  
58  
59  
60

## Abstract

Objectives: Relationship between low level air pollution and stroke are conflicting. This study was conducted to document the relationship between outdoor air pollution and ischemic stroke occurrence.

Methods: We studied the association between daily levels of outdoor pollutants (ozone (O<sub>3</sub>), nitrogen dioxide (NO<sub>2</sub>), particulate matter (PM<sub>10</sub>) and sulphur dioxide (SO<sub>2</sub>)) and ischemic stroke occurrence (Hospital registry) using a 5 years (2007-2011) time-stratified case-crossover analysis in Nice (France). The short-term effects on stroke occurrence for every 10 µg/m<sup>3</sup> increase in each pollutant was calculated using conditional logistic regression model adjusted for temperature, humidity, flu and holidays.

Results: 1729 ischemic stroke patients were enrolled (mean age: 76.1±14.0 years; men: 46.7%). No significant association was found between stroke occurrence and short term effects of all pollutants tested. In stratified analysis, we observed significant associations only between recurrent (n=280) and large artery ischemic stroke (n=578) onset and short term effect of ozone exposure. For an increase of 10 µg/m<sup>3</sup> of ozone level, recurrent stroke risk (mean D-1, D-2, D-3 lag) was increased by 12.1% (95% CI 1.5 to 23.9) and large artery stroke risk (mean D-3, D-4 lag) was increased by 8.0% (95% CI 2.0 to 16.6). Linear dose-response relationship for both subgroups was found.

Conclusions: Our results confirm the relationship between low level ozone exposure and ischemic stroke in high vascular risk subgroup with linear exposure-response relation, independently of other pollutants and meteorological parameters.

1  
2  
3 **Strengths and limitations of this study:** Relationship between low level air pollution and  
4 stroke are conflicting. This paper confirm the relationship between low level ozone exposure  
5 and ischemic stroke in high vascular risk subgroup with linear exposure-response relation,  
6 independently of other pollutants and meteorological parameters. PM2.5 was not studied  
7 because not monitored in Nice.  
8  
9  
10  
11  
12  
13  
14  
15  
16  
17  
18  
19  
20  
21  
22  
23  
24  
25  
26  
27  
28  
29  
30  
31  
32  
33  
34  
35  
36  
37  
38  
39  
40  
41  
42  
43  
44  
45  
46  
47  
48  
49  
50  
51  
52  
53  
54  
55  
56  
57  
58  
59  
60

For peer review only

## Main Text

### INTRODUCTION

Outdoor air pollution is considered as a major environmental health issue, responsible for an excess of death in the world. It is defined as any undesirable modification of air by substances either toxic or likely to have adverse effects on health. Outdoor air pollutants are known to increase morbidity and mortality of respiratory diseases [1]. However, in the 1950's and 1960's, epidemiological studies of acute severe pollution episodes have also shown an increasing cardiovascular and cerebrovascular mortality risk [2]. A link between acute air pollution and stroke mortality has been reported for the first time in the London fog incident study in December 1952 [2]. In the last decades, the consequences of low-level air pollution on cardiovascular mortality and morbidity have been clearly described [3-6]. By analogy, few studies have examined the role of short-term air pollution on ischemic stroke but actually no conclusion could be generalized [3, 5-24]. The purpose of the present study was to document the relationship between the characteristics of outdoor air pollution and the occurrence of ischemic stroke.

### MATERIALS AND METHODS

#### *Population studied*

We performed a 5 years (2007-2011) case-crossover analysis in Nice, France. We retrospectively enrolled consecutive stroke patients admitted at the University Hospital of Nice between January 2007 and December 2011. Querying French DRG based database (PMSI: Programme de Médicalisation des Systèmes d'Information) with I60 to I69 codes from the International Classification of Diseases (10<sup>th</sup> Revision), we screened all patients

1  
2  
3 hospitalized for stroke. We filtered the sample to patients living in Nice (geographic area  
4 defined by zip codes: 06000, 06100, 06200 and 06300). The diagnosis of ischemic stroke was  
5 reviewed and confirmed by a panel of neurologists using clinical and radiological data of  
6 medical records. Patients with another diagnosis than stroke were excluded. Demographic  
7 data, vascular risk factors, clinical and radiological characteristics of stroke were also  
8 collected from medical records.  
9  
10  
11  
12  
13  
14  
15

### 16 17 *Outdoor air pollution and meteorological data*

18  
19  
20 Nice is an urban city situated in the south-eastern part of France on the Mediterranean coast.  
21 According to the latest census, Nice has a population of 340 735 in 2009. Its climate is  
22 temperate and qualified as Mediterranean type. Surrounded by hills and mountains (south  
23 Alps), the city of Nice is sheltered from continuous of violent winds. Outdoor air pollution  
24 comes mainly from traffic due to high density of roads and international airport (first one in  
25 France after Paris airports).  
26  
27  
28  
29  
30  
31  
32  
33

34 Air pollution data were obtained from the regional agency for air quality monitoring  
35 (AirPACA). Exposure measurements during the study period were carried out in 2 of 13  
36 permanent monitoring stations in study area. Measures ( $\mu\text{g}/\text{m}^3$ ) were performed in urban  
37 station (Cagnes Ladoumègue) for following atmospheric pollutants: particulate matter (PM10)  
38 (Tapered Element Oscillating Microbalance), nitrogen dioxide (NO<sub>2</sub>) (chemiluminescence),  
39 sulphur dioxide (SO<sub>2</sub>) (ultraviolet photometry), and ozone (O<sub>3</sub>) (ultraviolet photometry).  
40  
41 Missing values were replaced by measures performed by the observational monitoring station  
42 located at Nice Airport. We computed for each pollutant 24-hours average and specifically for  
43 ozone 8-hours daytime periods.  
44  
45  
46  
47  
48  
49  
50  
51  
52  
53  
54  
55  
56  
57  
58  
59  
60

1  
2  
3 Daily meteorological data were obtained from the National Meteorological Office of Nice  
4 including temperature (° Celcius) and humidity (%). Moreover, data on influenza epidemics  
5 (weekly count) in region of Provence-Alpes-Cote-d'Azur were obtained from Sentiweb  
6 network.  
7  
8  
9  
10

### 11 *Statistical analysis*

12  
13  
14 Continuous variables were expressed as mean (standard deviation [SD]) or median  
15 (interquartile range [IQR]), and categorical variables as percentages. Spearman correlation  
16 coefficients (r) between air pollutants and atmospheric parameters were calculated. The time-  
17 stratified case-crossover design was used to examine the relationship between short-term  
18 effects of outdoor air pollutants and stroke. In this design, each subject enrolled was his own  
19 control. Case days were defined as the day of stroke. Control days were defined as the same  
20 day of the same stratum as the case day. Study time was stratified by months. Therefore,  
21 explicative variables levels at the case day were compared to levels of the same variables at  
22 control days. This method has the main advantage to control individual factors, the day of the  
23 week, season, time trend [24]. Conditional logistic regression was performed to estimate the  
24 association between short-term effects of each air pollutants measured and stroke onset. Odds  
25 ratio (OR) and 95% confidence intervals (CI) for a 10 µg/m<sup>3</sup> increase of pollutant level were  
26 adjusted for temperature and humidity with 1-day lag, influenza epidemics and holidays  
27 without day lag. The pollutant exposure was tested in models for 1-day lag, 2-day lag, or 3-  
28 day lag. Stratified analyses by subgroups were performed according to age, gender, risk  
29 vascular factors (tobacco use, diabetes mellitus, hypercholesterolemia, hypertension), and  
30 stroke etiological subtypes according the Trial of ORG 10172 in acute stroke treatment  
31 (TOAST). We evaluated dose-response relationships across four exposure levels of pollutant  
32  
33  
34  
35  
36  
37  
38  
39  
40  
41  
42  
43  
44  
45  
46  
47  
48  
49  
50  
51  
52  
53  
54  
55  
56  
57  
58  
59  
60

1  
2  
3 studied and the first quartile was used as the reference group. A p-value less than 0.05 was  
4  
5 considered as significant. The data were analyzed using Stata 10.0 SE software.  
6  
7

## 8 RESULTS

9

10  
11 During the study period (January 2007 to December 2011), there were 2067 patients living  
12  
13 Nice and admitted in University Hospital Center for ischemic stroke based on DRG database.  
14  
15 After neurologists review of medical records, 1729 ischemic stroke patients were enrolled for  
16  
17 final analysis. 620 (35.9%) of these patients were hospitalized in stroke unit. According to the  
18  
19 last population census 2009, annual ischemic stroke incidence rates (by 100.000) in studied  
20  
21 area were respectively from 2007 to 2011: 100, 100, 98, 96 and 112. Mean age was 76.1±14.0  
22  
23 years, and 46.7% were men (Table 1).  
24  
25

26  
27 The distribution of air pollutants and meteorological variables is shown in Table 2. Spearman  
28  
29 correlation coefficients (r) were ranged from 0.01 to 0.25 between each studied pollutants,  
30  
31 except between O<sub>3</sub> and NO<sub>2</sub> (r=-0.54). Correlation coefficient between minimal temperature  
32  
33 and O<sub>3</sub> was r=0.67 (Online only data supplement Table I).  
34  
35

36  
37 No significant association was found between stroke occurrence and short term effects of all  
38  
39 pollutants tested. In addition, we performed stratified subgroup analysis according to gender,  
40  
41 age by decade, incident/recurrent stroke status, vascular risk factors, presence of atrial  
42  
43 fibrillation, stroke etiological subgroups. We observed significant associations only between  
44  
45 recurrent (n=280) and large artery ischemic stroke (n=578) onset and short-term effect of  
46  
47 ozone with (Table 3). In recurrent stroke subgroup, for an increase of 10 µg/m<sup>3</sup> of ozone level  
48  
49 (mean D-1, D-2, D-3 lag), stroke risk was significantly increased by 12.1% (95% CI 1.5 to  
50  
51 23.9). Adjusted OR between ozone exposure (mean D-3, D-4) and large artery stroke  
52  
53 subgroup was 1.080 (95% CI 1.002 to 1.166). No significant association was observed with  
54  
55  
56  
57  
58  
59  
60



1  
2  
3 other pollutants than ozone. Adjusted in two-pollutant models, OR were not affected. Using  
4  
5 ozone quartiles (1<sup>st</sup> quartile as the reference group), linear dose-response relationship for both  
6  
7 subgroups was observed (Figure 1). Baseline characteristics in recurrent stroke subgroup and  
8  
9 large artery stroke subgroup were shown in Figure 2.  
10

## 11 12 **DISCUSSION**

13  
14  
15 Our study assessed the short-term effect of ozone exposure on selected population of ischemic  
16  
17 stroke in a city specially polluted by ozone. An elevation of 10 µg/m<sup>3</sup> of ozone concentration  
18  
19 increases stroke risk with few days lag in recurrent (≈12%) and large artery stroke (≈8%)  
20  
21 subgroups only. Linear dose-response relation was observed systematically in both groups. In  
22  
23 these groups, the common feature of the patients was that they cumulate vascular risk factors.  
24  
25 No significant association was found between all ischemic stroke groups and atmospheric  
26  
27 pollutants studied (O<sub>3</sub>, NO<sub>2</sub>, SO<sub>2</sub> and PM10).  
28  
29

30  
31  
32 Several studies have investigated the association between outdoor air pollution and stroke [3,  
33  
34 5-24]. Results of these studies are conflicting and hamper generalization of conclusions.  
35  
36 Heterogeneous methodological considerations are the main explanation of this conflict.  
37  
38 Methodological differences are observed in patient selection, study design, outcomes choice  
39  
40 (incidence, hospital admission, mortality), and assessment of individual exposure to selected  
41  
42 pollutants [20]. Few published studies investigated specially the association between  
43  
44 occurrence of ischemic stroke and ozone exposure using case crossover design [8, 15, 17, 19,  
45  
46 21] or time series analysis method [3, 12, 16, 22]. Consistent with our results, the majority of  
47  
48 these studies do not observe relationship between ozone exposure and occurrence of ischemic  
49  
50 stroke [3, 8, 17, 19, 21, 22]. Whenever relationship was revealed, association was borderline  
51  
52 significant [16], or not confirmed by a second study on the same area of investigation [15,  
53  
54 19]. Despite the fact that the link between ischemic stroke and ozone exposure is not obvious,  
55  
56  
57  
58  
59  
60

1  
2  
3 results in subgroup analyses seem to identify a population at risk for ozone exposure. In  
4  
5 recurrent ischemic stroke subgroup, a significant increase of 12.1% (95% CI 1.5 to 23.9) in  
6  
7 stroke risk was observed for each increase of 10  $\mu\text{g}/\text{m}^3$  of ozone concentration in previous  
8  
9 days (mean D-1, D-2, D-3 lag). Consistent with this result, population-based study in Dijon  
10  
11 (France), revealed the same association (OR: 1.150; 95% CI 1.027 to 1.209) with 3 days lag  
12  
13 [19]. Similarly, a significant association was observed in large artery stroke subgroup (mean  
14  
15 D-3, D-4, OR: 1.080; 95% CI 1.002 to 1.166). This link was observed in previous study  
16  
17 (Dijon) especially in this stroke etiological subgroup [15]. Associations in other ischemic  
18  
19 stroke subgroups are not systematically confirmed (age, gender, vascular risk factors, and  
20  
21 season) [3, 15, 19, 21, 22]. Our study confirms the short-term effects of ozone exposure on  
22  
23 stroke patients with high vascular risk [15, 19].  
24  
25  
26  
27

28 Our findings suggest that exposure to ozone, main photochemical pollutant, could increase the  
29  
30 risk of ischemic stroke in population subgroups (recurrent stroke, large arteries stroke)  
31  
32 particularly exposed to vascular risks factors inducing atherosclerosis. Physiopathological  
33  
34 pathways linking ischemic stroke and ozone exposure still remain largely unclear and  
35  
36 probably complex. Some studies support a delayed effect (1 to 3 days lag) between acute  
37  
38 exposure of ozone pollution and stroke onset [15, 19]. Ozone urban pollution effects on  
39  
40 healthy subjects are associated with systemic inflammatory responses, oxidative stress, blood  
41  
42 coagulation [25, 26]. These acute phenomena induced by even low levels of ozone could be  
43  
44 the trigger of ischemic event consecutively to atherosclerotic plaque instability, alterations in  
45  
46 endothelial function, and increased coagulation and thrombosis [27]. As suggested by  
47  
48 Henrotin et al., we hypothesized that short term effect of ozone exposure could be involved  
49  
50 especially among subjects with high vascular risk [19].  
51  
52  
53  
54  
55  
56  
57  
58  
59  
60

1  
2  
3 In order to establish a causal relationship between ozone exposure and stroke onset, we  
4 studied the exposure-response relation, main criteria identified by Hill [28]. Consistent with  
5 previous reports, we show a linear exposure-response relationship between ozone  
6 concentration and ischemic stroke in subgroups identified in previous reports [15, 19].  
7  
8  
9

10  
11  
12 Our study has several limitations. The question of exhaustiveness of stroke patients living  
13 Nice in this hospital-based study was considered. In Nice, patients with suspicion of stroke  
14 are admitted in priority in University Hospital Center. Likewise, incidence of ischemic stroke  
15 was consistent with epidemiological data in France. The question of individual exposure  
16 measurement is generally discussed. The main limit is that we used air pollution levels from  
17 air monitoring station to represent individuals' exposure. However, we limited our  
18 investigations in small geographic area (72 km<sup>2</sup>) not considered as a polluted town except for  
19 ozone (median 53.3 [32.6-69.2] µg/m<sup>3</sup>). Moreover, in the stroke population studied, elderly  
20 patients are mostly retired and have daily activity in study area. Since ozone concentration is  
21 correlated with meteorological parameters, temperature and humidity were incorporated into  
22 our models. Association between ozone pollution and stroke can be confounded by other  
23 pollutants studied, especially particles. Effects of ozone alone are not modified using adjusted  
24 models for each of the other pollutants (NO<sub>2</sub>, SO<sub>2</sub> and PM<sub>10</sub>). PM<sub>2.5</sub> was not studied  
25 because not monitored in Nice.  
26  
27  
28  
29  
30  
31  
32  
33  
34  
35  
36  
37  
38  
39  
40  
41  
42  
43

#### 44 **SUMMARY**

45  
46  
47 The consequences of ozone pollution on respiratory system and mortality are well  
48 documented [1]. Our results confirm the relationship between low level ozone exposure and  
49 ischemic stroke in high vascular risk subgroup with linear exposure-response relation,  
50 independently of other pollutants and meteorological parameters. Reproducibility of previous  
51 results is one of the main Hills criterion to induce causality of ozone exposure. Even if the  
52  
53  
54  
55  
56  
57  
58  
59  
60

1  
2  
3 individual risk is low, to identify an association between ozone and ischemic stroke incidence  
4  
5 is important from a public health point of view, since a large population is concerned.  
6  
7 Physiopathological processes underlying this association between ischemic stroke and ozone  
8  
9 exposure remain to be investigated.  
10  
11  
12  
13  
14  
15  
16  
17  
18  
19  
20  
21  
22  
23  
24  
25  
26  
27  
28  
29  
30  
31  
32  
33  
34  
35  
36  
37  
38  
39  
40  
41  
42  
43  
44  
45  
46  
47  
48  
49  
50  
51  
52  
53  
54  
55  
56  
57  
58  
59  
60

For peer review only

**Acknowledgments:**

The authors thank AirPACA association and Sentiweb network who provided respectively daily measures of outdoor air pollution and data on influenza epidemics in region of Provence-Alpes-Cote-d'Azur.

For peer review only

1  
2  
3  
4  
5  
6  
7  
8  
9  
10  
11  
12  
13  
14  
15  
16  
17  
18  
19  
20  
21  
22  
23  
24  
25  
26  
27  
28  
29  
30  
31  
32  
33  
34  
35  
36  
37  
38  
39  
40  
41  
42  
43  
44  
45  
46  
47  
48  
49  
50  
51  
52  
53  
54  
55  
56  
57  
58  
59  
60

**Source of Funding:**

None

For peer review only

1  
2  
3 **Conflict(s)-of-Interest/Disclosure(s):**  
4

5  
6 None.  
7  
8  
9  
10  
11  
12  
13  
14  
15  
16  
17  
18  
19  
20  
21  
22  
23  
24  
25  
26  
27  
28  
29  
30  
31  
32  
33  
34  
35  
36  
37  
38  
39  
40  
41  
42  
43  
44  
45  
46  
47  
48  
49  
50  
51  
52  
53  
54  
55  
56  
57  
58  
59  
60

For peer review only

**Reference list**

- [1] Brunekreef B, Holgate ST. Air pollution and health. *Lancet* 2002;360:1233-1242.
- [2] Logan WP. Mortality in the London fog incident, 1952. *Lancet* 1953;1:336-338.
- [3] Ponka A, Virtanen M. Low-level air pollution and hospital admissions for cardiac and cerebrovascular diseases in Helsinki. *Am J Public Health* 1996;86:1273-1280.
- [4] Samet JM, Dominici F, Curriero FC, et al. Fine particulate air pollution and mortality in 20 U.S. cities, 1987-1994. *N Engl J Med* 2000;343:1742-1749.
- [5] Zeller M, Giroud M, Royer C, et al. Air pollution and cardiovascular and cerebrovascular disease: Epidemiologic data. *Presse Med* 2006;35:1517-1522.
- [6] Larrieu S, Jusot JF, Blanchard M, et al. Short term effects of air pollution on hospitalizations for cardiovascular diseases in eight French cities: the PSAS program. *Sci Total Environ* 2007;387:105-112.
- [7] Hong YC, Lee JT, Kim H, et al. Air pollution: a new risk factor in ischemic stroke mortality. *Stroke* 2002;33:2165-2169.
- [8] Tsai SS, Goggins WB, Chiu HF, et al. Evidence for an association between air pollution and daily stroke admissions in Kaohsiung, Taiwan. *Stroke* 2003;34:2612-2616.
- [9] Wellenius GA, Schwartz J, Mittleman MA. Air pollution and hospital admissions for ischemic and hemorrhagic stroke among medicare beneficiaries. *Stroke* 2005;36:2549-2553.



- 1  
2  
3 [10] Maheswaran R, Haining RP, Brindley P, et al. Outdoor air pollution and stroke in  
4 Sheffield, United Kingdom: a small-area level geographical study. *Stroke*  
5 2005;36:239-243.  
6  
7  
8  
9  
10 [11] Low RB, Bielory L, Qureshi AI, et al. The relation of stroke admissions to recent  
11 weather, airborne allergens, air pollution, seasons, upper respiratory infections, and  
12 asthma incidence, September 11, 2001, and day of the week. *Stroke* 2006;37:951-957.  
13  
14  
15 [12] Chan CC, Chuang KJ, Chien LC, et al. Urban air pollution and emergency admissions  
16 for cerebrovascular diseases in Taipei, Taiwan. *Eur Heart J* 2006;27:1238-1244.  
17  
18 [13] Ballester F, Rodriguez P, Iniguez C, et al. Air pollution and cardiovascular admissions  
19 association in Spain: results within the EMECAS project. *J Epidemiol Community*  
20 *Health* 2006;60:328-336.  
21  
22  
23 [14] Kettunen J, Lanki T, Tiittanen P, et al. Associations of fine and ultrafine particulate air  
24 pollution with stroke mortality in an area of low air pollution levels. *Stroke*  
25 2007;38:918-922.  
26  
27  
28  
29  
30 [15] Henrotin JB, Besancenot JP, Bejot Y, et al. Short-term effects of ozone air pollution  
31 on ischaemic stroke occurrence: a case-crossover analysis from a 10-year population-  
32 based study in Dijon, France. *Occup Environ Med* 2007;64:439-445.  
33  
34  
35  
36  
37  
38 [16] Lisabeth LD, Escobar JD, Dvornich JT, et al. Ambient air pollution and risk for  
39 ischemic stroke and transient ischemic attack. *Ann Neurol* 2008;64:53-59.  
40  
41  
42  
43  
44  
45 [17] Oudin A, Stromberg U, Jakobsson K, et al. Estimation of short-term effects of air  
46 pollution on stroke hospital admissions in southern Sweden. *Neuroepidemiology*  
47 2010;34:131-142.  
48  
49  
50  
51  
52  
53  
54  
55  
56  
57  
58  
59  
60

- 1  
2  
3 [18] Maheswaran R, Pearson T, Smeeton NC, et al. Impact of outdoor air pollution on  
4 survival after stroke: population-based cohort study. *Stroke* 2010;41:869-877.  
5  
6  
7  
8 [19] Henrotin JB, Zeller M, Lorgis L, et al. Evidence of the role of short-term exposure to  
9 ozone on ischaemic cerebral and cardiac events: the Dijon Vascular Project (DIVA).  
10 *Heart* 2010;96:1990-1996.  
11  
12  
13 [20] Hennerici MG. Report of the 20th European Stroke Conference, Hamburg, May 24-  
14 27, 2011. *Cerebrovasc Dis* 2011;32:589-613.  
15  
16  
17 [21] Mechtouff L, Canoui-Poitrine F, Schott AM, et al. Lack of association between air  
18 pollutant exposure and short-term risk of ischaemic stroke in Lyon, France. *Int J*  
19 *Stroke* 2012.  
20  
21  
22 [22] Maheswaran R, Pearson T, Smeeton NC, et al. Outdoor air pollution and incidence of  
23 ischemic and hemorrhagic stroke: a small-area level ecological study. *Stroke*  
24 2012;43:22-27.  
25  
26  
27 [23] Chen R, Zhang Y, Yang C, et al. Acute effect of ambient air pollution on stroke  
28 mortality in the China air pollution and health effects study. *Stroke* 2013;44:954-960.  
29  
30  
31 [24] Xu X, Sun Y, Ha S, et al. Association between Ozone Exposure and Onset of Stroke  
32 in Allegheny County, Pennsylvania, USA, 1994-2000. *Neuroepidemiology* 2013;41:2-  
33 6.  
34  
35  
36 [25] Chuang KJ, Chan CC, Su TC, et al. The effect of urban air pollution on inflammation,  
37 oxidative stress, coagulation, and autonomic dysfunction in young adults. *Am J Respir*  
38 *Crit Care Med* 2007;176:370-376.  
39  
40  
41  
42  
43  
44  
45  
46  
47  
48  
49  
50  
51  
52  
53  
54  
55  
56  
57  
58  
59  
60

- 1  
2  
3 [26] Jang AS, Choi IS, Yang SY, et al. Antioxidant responsiveness in BALB/c mice  
4 exposed to ozone. *Respiration* 2005;72:79-84.  
5  
6  
7  
8 [27] O'Neill MS, Veves A, Zanobetti A, et al. Diabetes enhances vulnerability to  
9 particulate air pollution-associated impairment in vascular reactivity and endothelial  
10 function. *Circulation* 2005;111:2913-2920.  
11  
12  
13  
14  
15 [28] Dab W, Segala C, Dor F, et al. Air pollution and health: correlation or causality? The  
16 case of the relationship between exposure to particles and cardiopulmonary mortality.  
17  
18  
19  
20  
21  
22  
23  
24  
25  
26  
27  
28  
29  
30  
31  
32  
33  
34  
35  
36  
37  
38  
39  
40  
41  
42  
43  
44  
45  
46  
47  
48  
49  
50  
51  
52  
53  
54  
55  
56  
57  
58  
59  
60

**Figure Legends**

Figure 1: Dose relationship between ozone and ischemic stroke events (1A Recurrent ischemic stroke subgroup, 1B Large artery ischemic stroke subgroup).

Figure 2: Baseline characteristics according recurrent stroke subgroup (A) and large artery stroke subgroup (B) (\*:  $p < .05$ ).

For peer review only

1  
2  
3 **Tables**  
4  
5

6  
7  
8  
9  
10  
11  
12  
13  
14  
15  
16  
17  
18  
19  
20  
21  
22  
23  
24  
25  
26  
27  
28  
29  
30  
31  
32  
33  
34  
35  
36  
37  
38  
39  
40  
41  
42  
43  
44  
45  
46  
47  
48  
49  
50  
51  
52  
53  
54  
55  
56  
57  
58  
59  
60

|                                                     | All patients<br>(n=1729) | Incident<br>n=1449<br>(83.81%) | Recurrent<br>n=280<br>(16.19%) | p       |
|-----------------------------------------------------|--------------------------|--------------------------------|--------------------------------|---------|
| Demographic data                                    |                          |                                |                                |         |
| Men                                                 | 808 (46.73%)             | 683 (47.14%)                   | 125 (44.64%)                   | 0.0044  |
| Age                                                 | 76.06±14.04              | 75.48±14.29                    | 79.01±12.33                    | <0.0001 |
| < 55 years                                          | 141 (8.16%)              | 132 (9.11%)                    | 9 (3.21%)                      | 0.0011  |
| 55 to 64 years                                      | 186 (10.76%)             | 155 (10.70%)                   | 31 (11.07%)                    | 0.8532  |
| 65 to 74 years                                      | 324 (18.74%)             | 279 (19.25%)                   | 45 (16.07%)                    | 0.2114  |
| 75 to 84 years                                      | 524 (30.31%)             | 438 (30.23%)                   | 86 (30.71%)                    | 0.8712  |
| ≥ 85 years                                          | 554 (32.04%)             | 445 (30.71%)                   | 109 (38.93%)                   | 0.0071  |
| Cardiovascular risk factors                         |                          |                                |                                |         |
| Diabetes mellitus                                   | 311 (17.99%)             | 249 (17.18%)                   | 62 (22.14%)                    | 0.0481  |
| Hypertension                                        | 998 (57.72%)             | 803 (55.42%)                   | 195 (69.64%)                   | <0.0001 |
| Dyslipidemia                                        | 441 (25.51%)             | 348 (24.02%)                   | 93 (33.21%)                    | 0.0012  |
| Current smoker                                      | 410 (23.71%)             | 357 (24.64%)                   | 53 (18.93%)                    | 0.0398  |
| Overweight                                          | 226 (13.07%)             | 204 (14.08%)                   | 22 (7.86%)                     | 0.0047  |
| Coronary artery disease                             | 263 (15.21%)             | 209 (14.42%)                   | 54 (19.29%)                    | 0.0381  |
| Atrial fibrillation                                 | 527 (30.48%)             | 433 (29.88%)                   | 94 (33.57%)                    | 0.2198  |
| Classification of stroke etiologic subtypes (TOAST) |                          |                                |                                |         |
| Large artery                                        | 578 (33.43%)             | 479 (33.06%)                   | 99 (35.36%)                    | 0.4552  |
| Cardioembolic                                       | 563 (32.56%)             | 469 (32.37%)                   | 94 (33.57%)                    | 0.6938  |
| Lacunar stroke                                      | 153 (8.85%)              | 129 (8.90%)                    | 24 (8.57%)                     | 0.8582  |
| Other determined etiology                           | 43 (2.49%)               | 40 (2.76%)                     | 3 (1.07%)                      | 0.0966  |
| Undetermined etiology                               | 392 (22.67%)             | 332 (22.91%)                   | 60 (21.43%)                    | 0.5872  |
| Hospitalization in stroke unit                      | 620 (35.86%)             | 546 (37.68%)                   | 74 (26.43%)                    | 0.0003  |

54 **Table 1: Baseline characteristics of patients with ischemic stroke (incident and**  
55 **recurrent) hospitalized in Nice University Hospital from 2007 to 2011.**

|                                                          | Mean  | SD    | Minimum | Quartile 1 | Median | Quartile 3 | Maximum |
|----------------------------------------------------------|-------|-------|---------|------------|--------|------------|---------|
| Ozone daily 8-hours average ( $\mu\text{g}/\text{m}^3$ ) | 80.74 | 31.78 | 4.63    | 54.75      | 84.38  | 105.38     | 157.27  |
| Ozone daily 1-hour maximum ( $\mu\text{g}/\text{m}^3$ )  | 92.37 | 31.32 | 7.00    | 69.00      | 94.00  | 115.00     | 197.00  |
| Ozone 24-hours average ( $\mu\text{g}/\text{m}^3$ )      | 52.20 | 22.89 | 4.00    | 32.58      | 53.29  | 69.02      | 111.13  |
| PM10 ( $\mu\text{g}/\text{m}^3$ )                        | 28.48 | 9.81  | 1.00    | 22.00      | 28.00  | 34.00      | 74.00   |
| NO <sub>2</sub> ( $\mu\text{g}/\text{m}^3$ )             | 26.22 | 8.69  | 3.00    | 20.00      | 25.00  | 32.00      | 59.00   |
| SO <sub>2</sub> ( $\mu\text{g}/\text{m}^3$ )             | 1.23  | 1.18  | 0.00    | 0.00       | 1.00   | 2.00       | 10.00   |
| Minimum temperature ( $^{\circ}\text{C}$ )               | 13.02 | 5.98  | -1.60   | 7.80       | 12.90  | 18.20      | 25.90   |
| Maximum humidity (%)                                     | 81.40 | 9.07  | 40.00   | 76.00      | 83.00  | 88.00      | 97.00   |

**Table 2: Distribution of air pollution concentrations and meteorological parameters in Nice (France) between 2007 to 2012.**

|       |             |             | All ischemic stroke (n=1729) |                  |        | Recurrent stroke (n=280) |                  |        | Large artery stroke (n=578) |                  |       |
|-------|-------------|-------------|------------------------------|------------------|--------|--------------------------|------------------|--------|-----------------------------|------------------|-------|
|       |             |             | Ora                          | 95% IC           | p      | Ora                      | 95% IC           | p      | Ora                         | 95% IC           | p     |
| Ozone | D-1         | 8h average  | 0.9917                       | 0.9584 to 1.0261 | 0.633  | 1.0899                   | 1.0009 to 1.1867 | 0.047  | 0.9697                      | 0.9119 to 1.0310 | 0.326 |
|       |             | 1h maximum  | 0.9957                       | 0.9644 to 1.0281 | 0.795  | 1.0641                   | 0.9824 to 1.1527 | 0.127  | 0.9881                      | 0.9334 to 1.0460 | 0.682 |
|       |             | 24h average | 1.0036                       | 0.9578 to 1.0517 | 0.877  | 1.0793                   | 0.9616 to 1.2115 | 0.195  | 0.9983                      | 0.9190 to 1.0843 | 0.968 |
|       | D-2         | 8h average  | 0.9976                       | 0.9657 to 1.0306 | 0.888  | 1.0957                   | 1.0086 to 1.1903 | 0.030  | 0.9903                      | 0.9347 to 1.0491 | 0.741 |
|       |             | 1h maximum  | 1.0040                       | 0.9738 to 1.0351 | 0.795  | 1.0955                   | 1.0144 to 1.1831 | 0.020  | 0.9979                      | 0.9457 to 1.0529 | 0.940 |
|       |             | 24h average | 1.0015                       | 0.9598 to 1.0451 | 0.942  | 1.0638                   | 0.9587 to 1.1804 | 0.244  | 1.0097                      | 0.9365 to 1.0885 | 0.801 |
|       | D-3         | 8h average  | 0.9987                       | 0.9670 to 1.0314 | 0.939  | 1.0601                   | 0.9784 to 1.1487 | 0.154  | 1.0261                      | 0.9703 to 1.0852 | 0.366 |
|       |             | 1h maximum  | 0.9968                       | 0.9671 to 1.0273 | 0.836  | 1.0380                   | 0.9635 to 1.1184 | 0.326  | 1.0254                      | 0.9728 to 1.0808 | 0.349 |
|       |             | 24h average | 1.0046                       | 0.9644 to 1.0466 | 0.822  | 1.0838                   | 0.9788 to 1.2000 | 0.122  | 1.0519                      | 0.9802 to 1.1289 | 0.160 |
| D-4   | 8h average  | 1.0067      | 0.9751 to 1.0393             | 0.681            | 1.0169 | 0.9395 to 1.1006         | 0.678            | 1.0359 | 0.9808 to 1.0941            | 0.205            |       |
|       | 1h maximum  | 0.9978      | 0.9684 to 1.0280             | 0.887            | 1.0038 | 0.9321 to 1.0811         | 0.918            | 1.0290 | 0.9777 to 1.0829            | 0.272            |       |
|       | 24h average | 1.0114      | 0.9711 to 1.0534             | 0.583            | 1.0248 | 0.9260 to 1.1342         | 0.635            | 1.0787 | 1.0065 to 1.1561            | 0.032            |       |
| PM10  | D-1         |             | 1.0143                       | 0.9518 to 1.0806 | 0.659  | 1.0041                   | 0.5586 to 1.7995 | 0.989  | 1.0347                      | 0.9282 to 1.1527 | 0.536 |
|       | D-2         |             | 0.9861                       | 0.9238 to 1.0523 | 0.674  | 0.9518                   | 0.8106 to 1.1167 | 0.545  | 0.9350                      | 0.8349 to 1.0464 | 0.242 |
|       | D-3         |             | 0.9788                       | 0.9203 to 1.0405 | 0.493  | 1.0047                   | 0.8532 to 1.182  | 0.955  | 0.9436                      | 0.8475 to 1.0501 | 0.288 |
|       | D-4         |             | 0.9780                       | 0.9202 to 1.0391 | 0.473  | 0.9911                   | 0.8520 to 1.152  | 0.908  | 0.9544                      | 0.8572 to 1.0620 | 0.392 |
| NO2   | D-1         |             | 1.0307                       | 0.9367 to 1.1336 | 0.533  | 0.8960                   | 0.7689 to 1.0434 | 0.158  | 1.0293                      | 0.8699 to 1.2169 | 0.735 |
|       | D-2         |             | 0.9931                       | 0.9029 to 1.0918 | 0.887  | 0.9427                   | 0.7403 to 1.1991 | 0.631  | 1.0494                      | 0.8894 to 1.2372 | 0.565 |
|       | D-3         |             | 0.9462                       | 0.8607 to 1.0396 | 0.250  | 1.1262                   | 0.8767 to 1.4449 | 0.349  | 0.9147                      | 0.7743 to 1.0796 | 0.292 |
|       | D-4         |             | 0.9462                       | 0.8607 to 1.0396 | 0.250  | 0.8931                   | 0.7047 to 1.1306 | 0.348  | 0.9147                      | 0.7743 to 1.0796 | 0.292 |
| SO2   | D-1         |             | 1.0069                       | 0.5986 to 1.6893 | 0.979  | 0.653                    | 0.164 to 2.5822  | 0.544  | 1.0789                      | 0.4507 to 2.5712 | 0.864 |
|       | D-2         |             | 0.8763                       | 0.5138 to 1.4905 | 0.626  | 0.8916                   | 0.2525 to 3.1284 | 0.858  | 1.1784                      | 0.4790 to 2.8858 | 0.719 |
|       | D-3         |             | 1.2539                       | 0.7405 to 2.1174 | 0.397  | 0.7231                   | 0.1983 to 2.6188 | 0.622  | 0.9351                      | 0.3630 to 2.3973 | 0.889 |
|       | D-4         |             | 1.4852                       | 0.8956 to 2.4567 | 0.123  | 1.3587                   | 0.3735 to 4.9101 | 0.640  | 1.6564                      | 0.7140 to 3.8260 | 0.237 |

**Table 3: Adjusted odds ratios between ischemic stroke and outdoor pollutants exposure for an increase of 10 µg/m<sup>3</sup> in Nice (France) between 2007 to 2011.**

1  
2  
3  
4  
5  
6  
7  
8  
9  
10  
11  
12  
13  
14  
15  
16  
17  
18  
19  
20  
21  
22  
23  
24  
25  
26  
27  
28  
29  
30  
31  
32  
33  
34  
35  
36  
37  
38  
39  
40  
41  
42  
43  
44  
45  
46  
47  
48  
49  
50  
51  
52  
53  
54  
55  
56  
57  
58  
59  
60

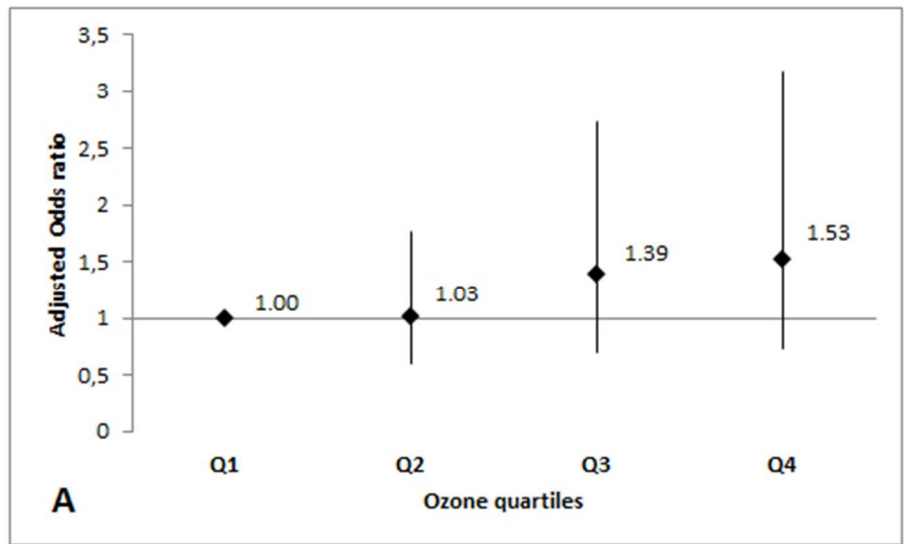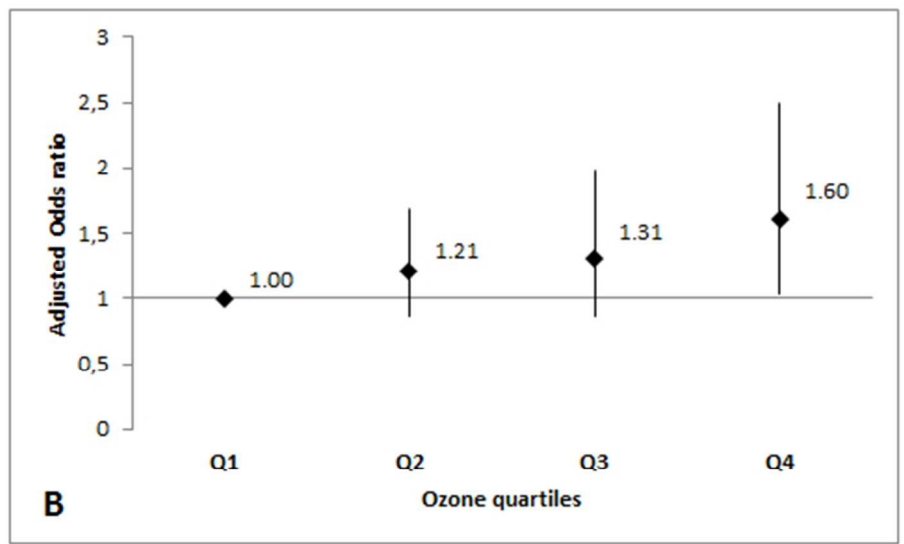

Dose relationship between ozone and ischemic stroke events (1A Recurrent ischemic stroke subgroup, 1B Large artery ischemic stroke subgroup).  
45x54mm (300 x 300 DPI)



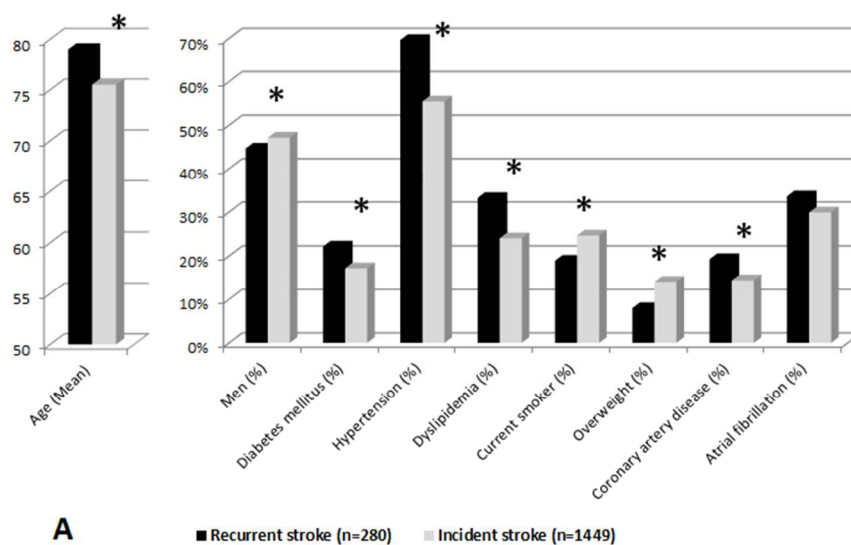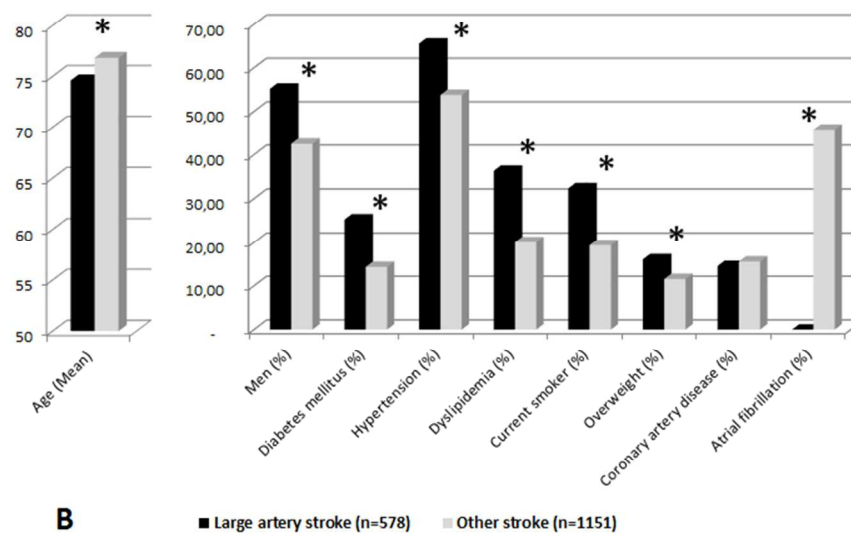

Baseline characteristics according recurrent stroke subgroup (A) and large artery stroke subgroup (B) (\*: p<.05).

62x81mm (300 x 300 DPI)

|                       | Ozone (8h average) | Ozone (1h maximum) | Ozone (24h average) | PM10   | NO2    | SO2    | Temperature (minimum) | Humidity (Maximum) |
|-----------------------|--------------------|--------------------|---------------------|--------|--------|--------|-----------------------|--------------------|
| Ozone (8h average)    | 1.000              |                    |                     |        |        |        |                       |                    |
| Ozone (1h maximum)    | 0.980              | 1.000              |                     |        |        |        |                       |                    |
| Ozone (24h average)   | 0.954              | 0.927              | 1.000               |        |        |        |                       |                    |
| PM10                  | 0.100              | 0.140              | 0.009               | 1.000  |        |        |                       |                    |
| NO2                   | -0.472             | -0.421             | -0.538              | 0.251  | 1.000  |        |                       |                    |
| SO2                   | -0.075             | -0.068             | -0.069              | 0.109  | 0.148  | 1.000  |                       |                    |
| Temperature (minimum) | 0.680              | 0.672              | 0.670               | 0.094  | -0.535 | -0.096 | 1.000                 |                    |
| Humidity (maximum)    | -0.068             | -0.072             | -0.099              | -0.064 | -0.122 | -0.010 | 0.085                 | 1.000              |

**Data supplement Table I: Spearman correlation between air pollutant level and meteorological variables.**



**Ozone air pollution and ischemic stroke occurrence: a case-crossover study in Nice, France.**

|                                    |                                                                                                                                                                                                                                                                                                                                                                        |
|------------------------------------|------------------------------------------------------------------------------------------------------------------------------------------------------------------------------------------------------------------------------------------------------------------------------------------------------------------------------------------------------------------------|
| Journal:                           | <i>BMJ Open</i>                                                                                                                                                                                                                                                                                                                                                        |
| Manuscript ID:                     | bmjopen-2013-004060.R1                                                                                                                                                                                                                                                                                                                                                 |
| Article Type:                      | Research                                                                                                                                                                                                                                                                                                                                                               |
| Date Submitted by the Author:      | 25-Oct-2013                                                                                                                                                                                                                                                                                                                                                            |
| Complete List of Authors:          | SUISSA, Laurent; University Hospital of Nice, Stroke Unit<br>FORTIER, Mikael; University Hospital of Nice, Department of Emergency<br>Medecine<br>LACHAUD, Sylvain; University Hospital of Nice, Stroke Unit<br>STACCINI, Pascal; University Hospital of Nice, Department of Medical<br>Information<br>MAHAGNE, Marie-Hélène; University Hospital of Nice, Stroke Unit |
| <b>Primary Subject<br>Heading</b>: | Occupational and environmental medicine                                                                                                                                                                                                                                                                                                                                |
| Secondary Subject Heading:         | Epidemiology, Neurology, Public health                                                                                                                                                                                                                                                                                                                                 |
| Keywords:                          | Epidemiology < TROPICAL MEDICINE, Stroke < NEUROLOGY, PUBLIC<br>HEALTH                                                                                                                                                                                                                                                                                                 |
|                                    |                                                                                                                                                                                                                                                                                                                                                                        |

SCHOLARONE™  
Manuscripts

Peer review only

1  
2  
3 **Title page**  
4

5 **Ozone air pollution and ischemic stroke occurrence: a case-crossover study in Nice,**  
6  
7  
8 **France.**  
9

10  
11 SUISSA Laurent<sup>1</sup>, MD ; FORTIER Mikael<sup>2</sup>, MD ; LACHAUD Sylvain<sup>1</sup>, MD ; STACCINI  
12  
13 Pascal<sup>3</sup>, MD, PhD ; MAHAGNE Marie-Hélène<sup>1</sup>, MD, PhD.  
14

15  
16 <sup>1</sup> Stroke Center - University Hospital of Nice – Nice, France.  
17

18  
19 <sup>2</sup> Department of Emergency Medecine – University Hospital of Nice – Nice, France.  
20

21  
22 <sup>3</sup> Department of Medical Information – University Hospital of Nice – Nice, France.  
23  
24

25 **Corresponding author and address for reprints:**  
26

27  
28 Dr SUISSA Laurent - Hospital Saint-Roch – Unité Neurovasculaire - 5, rue Pierre Devoluy –  
29  
30 06000 NICE – France.  
31

32  
33  
34 Phone : 0033492032720 – Fax : 0033492032721 – Mail : [suissa.laurent@free.fr](mailto:suissa.laurent@free.fr)  
35

36  
37 **Cover title:** Ozone air pollution and ischemic stroke occurrence  
38

39  
40 **Keywords:** Ischemic stroke; Outdoor air pollution; Ozone; Vascular risk factors.  
41

42  
43 **Words count:** 2000  
44  
45  
46  
47  
48  
49  
50  
51  
52  
53  
54  
55  
56  
57  
58  
59  
60

## Abstract

Objectives: Relationship between low level air pollution and stroke are conflicting. This study was conducted to document the relationship between outdoor air pollution and ischemic stroke occurrence.

Methods: We studied the association between daily levels of outdoor pollutants (ozone (O<sub>3</sub>), nitrogen dioxide (NO<sub>2</sub>), particulate matter (PM<sub>10</sub>) and sulphur dioxide (SO<sub>2</sub>)) and ischemic stroke occurrence (Hospital registry) using a 5 years (2007-2011) time-stratified case-crossover analysis in Nice (France). The short-term effects on stroke occurrence for every 10 µg/m<sup>3</sup> increase in each pollutant was calculated using conditional logistic regression model adjusted for temperature, humidity, flu and holidays.

Results: We enrolled 1729 ischemic stroke patients (mean age: 76.1±14.0 years; men: 46.7%). No significant association was found between stroke occurrence and short term effects of all pollutants tested. In stratified analysis, we observed significant associations only between recurrent (n=280) and large artery ischemic stroke (n=578) onset and short term effect of ozone exposure. For an increase of 10 µg/m<sup>3</sup> of ozone level, recurrent stroke risk (mean D-1, D-2, D-3 lag) was increased by 12.1% (95% CI 1.5 to 23.9) and large artery stroke risk (mean D-3, D-4 lag) was increased by 8.0% (95% CI 2.0 to 16.6). Linear dose-response relationship for both subgroups was found.

Conclusions: Our results confirm the relationship between low level ozone exposure and ischemic stroke in high vascular risk subgroup with linear exposure-response relation, independently of other pollutants and meteorological parameters.

1  
2  
3 **Strengths and limitations of this study:** Relationship between low level air pollution and  
4 stroke are conflicting. This paper confirm the relationship between low level ozone exposure  
5 and ischemic stroke in high vascular risk subgroup with linear exposure-response relation,  
6 independently of other pollutants and meteorological parameters. PM2.5 was not studied  
7 because not monitored in Nice.  
8  
9  
10  
11  
12  
13  
14  
15  
16  
17  
18  
19  
20  
21  
22  
23  
24  
25  
26  
27  
28  
29  
30  
31  
32  
33  
34  
35  
36  
37  
38  
39  
40  
41  
42  
43  
44  
45  
46  
47  
48  
49  
50  
51  
52  
53  
54  
55  
56  
57  
58  
59  
60

For peer review only

## Main Text

### INTRODUCTION

Outdoor air pollution is considered as a major environmental health issue, responsible for an excess of death in the world. It is defined as any undesirable modification of air by substances either toxic or likely to have adverse effects on health. Outdoor air pollutants are known to increase morbidity and mortality of respiratory diseases [1]. However, in the 1950's and 1960's, epidemiological studies of acute severe pollution episodes have also shown an increasing cardiovascular and cerebrovascular mortality risk [2]. A link between acute air pollution and stroke mortality has been reported for the first time in the London fog incident study in December 1952 [2]. In the last decades, the consequences of low-level air pollution on cardiovascular mortality and morbidity have been clearly described [3-6]. By analogy, few studies have examined the role of short-term air pollution on ischemic stroke but actually no conclusion could be generalized [3, 5-24]. The purpose of the present study was to document the relationship between the characteristics of outdoor air pollution and the occurrence of ischemic stroke.

### MATERIALS AND METHODS

#### *Population studied*

We performed a 5 years (2007-2011) case-crossover analysis in Nice, France. We retrospectively enrolled consecutive stroke patients admitted at the University Hospital of Nice between January 2007 and December 2011. Querying French DRG based database (PMSI: Programme de Médicalisation des Systèmes d'Information) with I60 to I69 codes from the International Classification of Diseases (10<sup>th</sup> Revision), we screened all patients

1  
2  
3 hospitalized for stroke. We filtered the sample to patients living in Nice (geographic area  
4 defined by zip codes: 06000, 06100, 06200 and 06300). The diagnosis of ischemic stroke was  
5 reviewed and confirmed by a panel of neurologists using clinical and radiological data of  
6  
7 medical records. Patients with another diagnosis than stroke were excluded. Demographic  
8  
9 data, vascular risk factors (WHO definitions), clinical and radiological characteristics of  
10  
11 stroke were also collected from medical records.  
12  
13  
14

### 15 16 17 ***Outdoor air pollution and meteorological data*** 18

19  
20 Nice is an urban city situated in the south-eastern part of France on the Mediterranean coast.  
21  
22 According to the latest census, Nice has a population of 340 735 in 2009. Its climate is  
23  
24 temperate and qualified as Mediterranean type. Surrounded by hills and mountains (south  
25  
26 Alps), the city of Nice is sheltered from continuous of violent winds. Outdoor air pollution  
27  
28 comes mainly from traffic due to high density of roads and international airport (first one in  
29  
30 France after Paris airports).  
31  
32

33  
34 Air pollution data were obtained from the regional agency for air quality monitoring  
35  
36 (AirPACA). Exposure measurements during the study period were carried out in 2 of 13  
37  
38 permanent monitoring stations in study area. Measures ( $\mu\text{g}/\text{m}^3$ ) were performed in urban  
39  
40 station (Cagnes Ladoumègue) for following atmospheric pollutants: particulate matter (PM10)  
41  
42 (Tapered Element Oscillating Microbalance), nitrogen dioxide (NO<sub>2</sub>) (chemiluminescence),  
43  
44 sulphur dioxide (SO<sub>2</sub>) (ultraviolet photometry), and ozone (O<sub>3</sub>) (ultraviolet photometry).  
45  
46 Missing values were replaced by measures performed by the observational monitoring station  
47  
48 located at Nice Airport. We computed for each pollutant 24-hours average and specifically for  
49  
50 ozone 8-hours daytime periods.  
51  
52  
53  
54  
55  
56  
57  
58  
59  
60



1  
2  
3 Daily meteorological data were obtained from the National Meteorological Office of Nice  
4 including temperature (° Celcius) and humidity (%). Moreover, data on influenza epidemics  
5 (weekly count) in region of Provence-Alpes-Cote-d'Azur were obtained from Sentiweb  
6 network.  
7  
8  
9  
10

### 11 *Statistical analysis*

12  
13  
14 Continuous variables were expressed as mean (standard deviation [SD]) or median  
15 (interquartile range [IQR]), and categorical variables as percentages. Spearman correlation  
16 coefficients (r) between air pollutants and atmospheric parameters were calculated. The time-  
17 stratified case-crossover design was used to examine the relationship between short-term  
18 effects of outdoor air pollutants and stroke. In this design, each subject enrolled was his own  
19 control. Case days were defined as the day of stroke. Control days were defined as the same  
20 day of the same stratum as the case day. Study time was stratified by months. Therefore,  
21 explicative variables levels at the case day were compared to levels of the same variables at  
22 control days. This method has the main advantage to control individual factors, the day of the  
23 week, season, time trend [24]. Conditional logistic regression was performed to estimate the  
24 association between short-term effects of each air pollutants measured and stroke onset. Odds  
25 ratio v (OR) and 95% confidence intervals (CI) for a 10 µg/m<sup>3</sup> increase of pollutant level were  
26 adjusted for temperature and humidity with 1-day lag, influenza epidemics and holidays  
27 without day lag. The pollutant exposure was tested in models for 1-day lag, 2-day lag, or 3-  
28 day lag. Stratified analyses by subgroups were performed according to age, gender, risk  
29 vascular factors (tobacco use, diabetes mellitus, hypercholesterolemia, hypertension), and  
30 stroke etiological subtypes according the Trial of ORG 10172 in acute stroke treatment  
31 (TOAST). We evaluated dose-response relationships across four exposure levels of pollutant  
32  
33  
34  
35  
36  
37  
38  
39  
40  
41  
42  
43  
44  
45  
46  
47  
48  
49  
50  
51  
52  
53  
54  
55  
56  
57  
58  
59  
60

1  
2  
3 studied and the first quartile was used as the reference group. A p-value less than 0.05 was  
4  
5 considered as significant. The data were analyzed using Stata 10.0 SE software.  
6  
7

## 8 RESULTS

9  
10  
11 During the study period (January 2007 to December 2011), there were 2067 patients living  
12  
13 Nice and admitted in University Hospital Center for ischemic stroke based on DRG database.  
14  
15 After neurologists review of medical records, 1729 ischemic stroke patients were enrolled for  
16  
17 final analysis. 620 (35.9%) of these patients were hospitalized in stroke unit. According to the  
18  
19 last population census 2009, annual ischemic stroke incidence rates (by 100.000) in studied  
20  
21 area were respectively from 2007 to 2011: 100, 100, 98, 96 and 112. Mean age was 76.1±14.0  
22  
23 years, and 46.7% were men (Table 1).  
24  
25

26  
27 The distribution of air pollutants and meteorological variables is shown in Table 2. Spearman  
28  
29 correlation coefficients (r) were ranged from 0.01 to 0.25 between each studied pollutants,  
30  
31 except between O<sub>3</sub> and NO<sub>2</sub> (r=-0.54). Correlation coefficient between minimal temperature  
32  
33 and O<sub>3</sub> was r=0.67 (Online only data supplement Table I).  
34  
35

36  
37 No significant association was found between stroke occurrence and short term effects of all  
38  
39 pollutants tested. In addition, we performed stratified subgroup analysis according to gender,  
40  
41 age by decade, incident/recurrent stroke status, vascular risk factors, presence of atrial  
42  
43 fibrillation, stroke etiological subgroups. We observed significant associations only between  
44  
45 recurrent (n=280) and large artery ischemic stroke (n=578) onset and short-term effect of  
46  
47 ozone with (Table 3). In recurrent stroke subgroup, for an increase of 10 µg/m<sup>3</sup> of ozone level  
48  
49 (mean D-1, D-2, D-3 lag), stroke risk was significantly increased by 12.1% (95% CI 1.5 to  
50  
51 23.9). Adjusted OR between ozone exposure (mean D-3, D-4) and large artery stroke  
52  
53 subgroup was 1.080 (95% CI 1.002 to 1.166). No significant association was observed with  
54  
55  
56  
57  
58  
59  
60

1  
2  
3 other pollutants than ozone. Adjusted in two-pollutant models, OR were not affected. Using  
4  
5 ozone quartiles (1<sup>st</sup> quartile as the reference group), linear dose-response relationship for both  
6  
7 subgroups was observed (Figure 1). Baseline characteristics in recurrent stroke subgroup and  
8  
9 large artery stroke subgroup were shown in Figure 2.  
10

## 11 12 **DISCUSSION**

13  
14  
15 Our study assessed the short-term effect of ozone exposure on selected population of ischemic  
16  
17 stroke in a city specially polluted by ozone. An elevation of 10  $\mu\text{g}/\text{m}^3$  of ozone concentration  
18  
19 increases stroke risk with few days lag in recurrent ( $\approx 12\%$ ) and large artery stroke ( $\approx 8\%$ )  
20  
21 subgroups only. Linear dose-response relation was observed systematically in both groups. In  
22  
23 these groups, the common feature of the patients was that they cumulate vascular risk factors.  
24  
25 No significant association was found between all ischemic stroke groups and atmospheric  
26  
27 pollutants studied ( $\text{O}_3$ ,  $\text{NO}_2$ ,  $\text{SO}_2$  and  $\text{PM}_{10}$ ).  
28  
29

30  
31  
32 Several studies have investigated the association between outdoor air pollution and stroke [3,  
33  
34 5-24]. Results of these studies are conflicting and hamper generalization of conclusions.  
35  
36 Heterogeneous methodological considerations are the main explanation of this conflict.  
37  
38 Methodological differences are observed in patient selection, study design, outcomes choice  
39  
40 (incidence, hospital admission, mortality), and assessment of individual exposure to selected  
41  
42 pollutants [20]. Few published studies investigated specially the association between  
43  
44 occurrence of ischemic stroke and ozone exposure using case crossover design [8, 15, 17, 19,  
45  
46 21] or time series analysis method [3, 12, 16, 22]. Consistent with our results, the majority of  
47  
48 these studies do not observe relationship between ozone exposure and occurrence of ischemic  
49  
50 stroke [3, 8, 17, 19, 21, 22]. Whenever relationship was revealed, association was borderline  
51  
52 significant [16], or not confirmed by a second study on the same area of investigation [15,  
53  
54 19]. Despite the fact that the link between ischemic stroke and ozone exposure is not obvious,  
55  
56  
57  
58  
59  
60

1  
2  
3 results in subgroup analyses seem to identify a population at risk for ozone exposure. In  
4  
5 recurrent ischemic stroke subgroup, a significant increase of 12.1% (95% CI 1.5 to 23.9) in  
6  
7 stroke risk was observed for each increase of 10  $\mu\text{g}/\text{m}^3$  of ozone concentration in previous  
8  
9 days (mean D-1, D-2, D-3 lag). Consistent with this result, population-based study in Dijon  
10  
11 (France), revealed the same association (OR: 1.150; 95% CI 1.027 to 1.209) with 3 days lag  
12  
13 [19]. Similarly, a significant association was observed in large artery stroke subgroup (mean  
14  
15 D-3, D-4, OR: 1.080; 95% CI 1.002 to 1.166). This link was observed in previous study  
16  
17 (Dijon) especially in this stroke etiological subgroup [15]. Associations in other ischemic  
18  
19 stroke subgroups are not systematically confirmed (age, gender, vascular risk factors, and  
20  
21 season) [3, 15, 19, 21, 22]. Our study confirms the short-term effects of ozone exposure on  
22  
23 stroke patients with high vascular risk [15, 19].  
24  
25  
26  
27

28 Our findings suggest that exposure to ozone, main photochemical pollutant, could increase the  
29  
30 risk of ischemic stroke in population subgroups (recurrent stroke, large arteries stroke)  
31  
32 particularly exposed to vascular risks factors inducing atherosclerosis. Physiopathological  
33  
34 pathways linking ischemic stroke and ozone exposure still remain largely unclear and  
35  
36 probably complex. Some studies support a delayed effect (1 to 3 days lag) between acute  
37  
38 exposure of ozone pollution and stroke onset [15, 19]. Ozone urban pollution effects on  
39  
40 healthy subjects are associated with systemic inflammatory responses, oxidative stress, blood  
41  
42 coagulation [25, 26]. These acute phenomena induced by even low levels of ozone could be  
43  
44 the trigger of ischemic event consecutively to atherosclerotic plaque instability, alterations in  
45  
46 endothelial function, and increased coagulation and thrombosis [27]. As suggested by  
47  
48 Henrotin et al., we hypothesized that short term effect of ozone exposure could be involved  
49  
50 especially among subjects with high vascular risk [19].  
51  
52  
53  
54  
55  
56  
57  
58  
59  
60

1  
2  
3 In order to establish a causal relationship between ozone exposure and stroke onset, we  
4 studied the exposure-response relation, main criteria identified by Hill [28]. Consistent with  
5 previous reports, we show a linear exposure-response relationship between ozone  
6 concentration and ischemic stroke in subgroups identified in previous reports [15, 19].  
7  
8  
9

10  
11  
12 Our study has several limitations. The question of completeness of stroke patients living Nice  
13 in this hospital-based study was discussed. In Nice, patients with suspicion of stroke are  
14 admitted in priority in University Hospital Center. Likewise, incidence of ischemic stroke was  
15 consistent with epidemiological data in France. The question of individual exposure  
16 measurement is generally discussed. The main limit is that we used air pollution levels from  
17 air monitoring station to represent individuals' exposure. However, we limited our  
18 investigations in small geographic area (72 km<sup>2</sup>) not considered as a polluted town except for  
19 ozone (median 53.3 [32.6-69.2] µg/m<sup>3</sup>). Moreover, in the stroke population studied, elderly  
20 patients are mostly retired and have daily activity in study area. Since ozone concentration is  
21 correlated with meteorological parameters, temperature and humidity were incorporated into  
22 our models. Association between ozone pollution and stroke can be confounded by other  
23 pollutants studied, especially particles. Effects of ozone alone are not modified using adjusted  
24 models for each of the other pollutants (NO<sub>2</sub>, SO<sub>2</sub> and PM<sub>10</sub>). PM<sub>2.5</sub> was not studied  
25 because not monitored in Nice.  
26  
27  
28  
29  
30  
31  
32  
33  
34  
35  
36  
37  
38  
39  
40  
41  
42  
43

#### 44 **SUMMARY**

45  
46  
47 The consequences of ozone pollution on respiratory system and mortality are well  
48 documented [1]. Our results confirm the relationship between low level ozone exposure and  
49 ischemic stroke in high vascular risk subgroup with linear exposure-response relation,  
50 independently of other pollutants and meteorological parameters. Reproducibility of previous  
51 results is one of the main Hills criterion to induce causality of ozone exposure. Even if the  
52  
53  
54  
55  
56  
57  
58  
59  
60

1  
2  
3 individual risk is low, to identify an association between ozone and ischemic stroke incidence  
4  
5 is important from a public health point of view, since a large population is concerned.  
6  
7 Physiopathological processes underlying this association between ischemic stroke and ozone  
8  
9 exposure remain to be investigated.  
10  
11  
12  
13  
14  
15  
16  
17  
18  
19  
20  
21  
22  
23  
24  
25  
26  
27  
28  
29  
30  
31  
32  
33  
34  
35  
36  
37  
38  
39  
40  
41  
42  
43  
44  
45  
46  
47  
48  
49  
50  
51  
52  
53  
54  
55  
56  
57  
58  
59  
60

For peer review only

**Acknowledgments:**

The authors thank AirPACA association and Sentiweb network who provided respectively daily measures of outdoor air pollution and data on influenza epidemics in region of Provence-Alpes-Cote-d'Azur.

**Source of Funding:**

None

**Conflict(s)-of-Interest/Disclosure(s):**

None.

**Contributorship Statement**

All authors have contributed to:

- 1) substantial contributions to conception and design, acquisition of data, or analysis and interpretation of data;
- 2) drafting the article or revising it critically for important intellectual content; and
- 3) final approval of the version to be published.

**Reference list**

- [1] Brunekreef B, Holgate ST. Air pollution and health. *Lancet* 2002;360:1233-1242.
- [2] Logan WP. Mortality in the London fog incident, 1952. *Lancet* 1953;1:336-338.
- [3] Ponka A, Virtanen M. Low-level air pollution and hospital admissions for cardiac and cerebrovascular diseases in Helsinki. *Am J Public Health* 1996;86:1273-1280.
- [4] Samet JM, Dominici F, Curriero FC, et al. Fine particulate air pollution and mortality in 20 U.S. cities, 1987-1994. *N Engl J Med* 2000;343:1742-1749.
- [5] Zeller M, Giroud M, Royer C, et al. Air pollution and cardiovascular and cerebrovascular disease: Epidemiologic data. *Presse Med* 2006;35:1517-1522.
- [6] Larrieu S, Jusot JF, Blanchard M, et al. Short term effects of air pollution on hospitalizations for cardiovascular diseases in eight French cities: the PSAS program. *Sci Total Environ* 2007;387:105-112.
- [7] Hong YC, Lee JT, Kim H, et al. Air pollution: a new risk factor in ischemic stroke mortality. *Stroke* 2002;33:2165-2169.
- [8] Tsai SS, Goggins WB, Chiu HF, et al. Evidence for an association between air pollution and daily stroke admissions in Kaohsiung, Taiwan. *Stroke* 2003;34:2612-2616.
- [9] Wellenius GA, Schwartz J, Mittleman MA. Air pollution and hospital admissions for ischemic and hemorrhagic stroke among medicare beneficiaries. *Stroke* 2005;36:2549-2553.



- 1  
2  
3 [10] Maheswaran R, Haining RP, Brindley P, et al. Outdoor air pollution and stroke in  
4 Sheffield, United Kingdom: a small-area level geographical study. *Stroke*  
5 2005;36:239-243.  
6  
7  
8  
9  
10 [11] Low RB, Bielory L, Qureshi AI, et al. The relation of stroke admissions to recent  
11 weather, airborne allergens, air pollution, seasons, upper respiratory infections, and  
12 asthma incidence, September 11, 2001, and day of the week. *Stroke* 2006;37:951-957.  
13  
14  
15  
16  
17 [12] Chan CC, Chuang KJ, Chien LC, et al. Urban air pollution and emergency admissions  
18 for cerebrovascular diseases in Taipei, Taiwan. *Eur Heart J* 2006;27:1238-1244.  
19  
20  
21  
22 [13] Ballester F, Rodriguez P, Iniguez C, et al. Air pollution and cardiovascular admissions  
23 association in Spain: results within the EMECAS project. *J Epidemiol Community*  
24 *Health* 2006;60:328-336.  
25  
26  
27  
28  
29  
30 [14] Kettunen J, Lanki T, Tiittanen P, et al. Associations of fine and ultrafine particulate air  
31 pollution with stroke mortality in an area of low air pollution levels. *Stroke*  
32 2007;38:918-922.  
33  
34  
35  
36  
37  
38 [15] Henrotin JB, Besancenot JP, Bejot Y, et al. Short-term effects of ozone air pollution  
39 on ischaemic stroke occurrence: a case-crossover analysis from a 10-year population-  
40 based study in Dijon, France. *Occup Environ Med* 2007;64:439-445.  
41  
42  
43  
44  
45  
46 [16] Lisabeth LD, Escobar JD, Dvornich JT, et al. Ambient air pollution and risk for  
47 ischemic stroke and transient ischemic attack. *Ann Neurol* 2008;64:53-59.  
48  
49  
50  
51 [17] Oudin A, Stromberg U, Jakobsson K, et al. Estimation of short-term effects of air  
52 pollution on stroke hospital admissions in southern Sweden. *Neuroepidemiology*  
53 2010;34:131-142.  
54  
55  
56  
57  
58  
59  
60

- 1  
2  
3 [18] Maheswaran R, Pearson T, Smeeton NC, et al. Impact of outdoor air pollution on  
4 survival after stroke: population-based cohort study. *Stroke* 2010;41:869-877.  
5  
6  
7  
8 [19] Henrotin JB, Zeller M, Lorgis L, et al. Evidence of the role of short-term exposure to  
9 ozone on ischaemic cerebral and cardiac events: the Dijon Vascular Project (DIVA).  
10 *Heart* 2010;96:1990-1996.  
11  
12  
13  
14  
15 [20] Hennerici MG. Report of the 20th European Stroke Conference, Hamburg, May 24-  
16 27, 2011. *Cerebrovasc Dis* 2011;32:589-613.  
17  
18  
19  
20  
21 [21] Mechtouff L, Canoui-Poitrine F, Schott AM, et al. Lack of association between air  
22 pollutant exposure and short-term risk of ischaemic stroke in Lyon, France. *Int J*  
23 *Stroke* 2012.  
24  
25  
26  
27  
28  
29 [22] Maheswaran R, Pearson T, Smeeton NC, et al. Outdoor air pollution and incidence of  
30 ischemic and hemorrhagic stroke: a small-area level ecological study. *Stroke*  
31 2012;43:22-27.  
32  
33  
34  
35  
36 [23] Chen R, Zhang Y, Yang C, et al. Acute effect of ambient air pollution on stroke  
37 mortality in the China air pollution and health effects study. *Stroke* 2013;44:954-960.  
38  
39  
40  
41  
42 [24] Xu X, Sun Y, Ha S, et al. Association between Ozone Exposure and Onset of Stroke  
43 in Allegheny County, Pennsylvania, USA, 1994-2000. *Neuroepidemiology* 2013;41:2-  
44 6.  
45  
46  
47  
48  
49 [25] Chuang KJ, Chan CC, Su TC, et al. The effect of urban air pollution on inflammation,  
50 oxidative stress, coagulation, and autonomic dysfunction in young adults. *Am J Respir*  
51 *Crit Care Med* 2007;176:370-376.  
52  
53  
54  
55  
56  
57  
58  
59  
60

- 1  
2  
3 [26] Jang AS, Choi IS, Yang SY, et al. Antioxidant responsiveness in BALB/c mice  
4 exposed to ozone. *Respiration* 2005;72:79-84.  
5  
6  
7  
8 [27] O'Neill MS, Veves A, Zanobetti A, et al. Diabetes enhances vulnerability to  
9 particulate air pollution-associated impairment in vascular reactivity and endothelial  
10 function. *Circulation* 2005;111:2913-2920.  
11  
12  
13 [28] Dab W, Segala C, Dor F, et al. Air pollution and health: correlation or causality? The  
14 case of the relationship between exposure to particles and cardiopulmonary mortality.  
15  
16 *J Air Waste Manag Assoc* 2001;51:220-235.  
17  
18  
19  
20  
21  
22  
23  
24  
25  
26  
27  
28  
29  
30  
31  
32  
33  
34  
35  
36  
37  
38  
39  
40  
41  
42  
43  
44  
45  
46  
47  
48  
49  
50  
51  
52  
53  
54  
55  
56  
57  
58  
59  
60

**Figure Legends**

Figure 1: Dose relationship between ozone and ischemic stroke events (1A Recurrent ischemic stroke subgroup, 1B Large artery ischemic stroke subgroup).

Figure 2: Baseline characteristics according recurrent stroke subgroup (A) and large artery stroke subgroup (B) (\*:  $p < .05$ ).

For peer review only

## Tables

|                                                     | All patients<br>(n=1729) | Incident<br>n=1449<br>(83.81%) | Recurrent<br>n=280<br>(16.19%) | p       |
|-----------------------------------------------------|--------------------------|--------------------------------|--------------------------------|---------|
| Demographic data                                    |                          |                                |                                |         |
| Men                                                 | 808 (46.73%)             | 683 (47.14%)                   | 125 (44.64%)                   | 0.0044  |
| Age                                                 | 76.06±14.04              | 75.48±14.29                    | 79.01±12.33                    | <0.0001 |
| < 55 years                                          | 141 (8.16%)              | 132 (9.11%)                    | 9 (3.21%)                      | 0.0011  |
| 55 to 64 years                                      | 186 (10.76%)             | 155 (10.70%)                   | 31 (11.07%)                    | 0.8532  |
| 65 to 74 years                                      | 324 (18.74%)             | 279 (19.25%)                   | 45 (16.07%)                    | 0.2114  |
| 75 to 84 years                                      | 524 (30.31%)             | 438 (30.23%)                   | 86 (30.71%)                    | 0.8712  |
| ≥ 85 years                                          | 554 (32.04%)             | 445 (30.71%)                   | 109 (38.93%)                   | 0.0071  |
| Cardiovascular risk factors                         |                          |                                |                                |         |
| Diabetes mellitus                                   | 311 (17.99%)             | 249 (17.18%)                   | 62 (22.14%)                    | 0.0481  |
| Hypertension                                        | 998 (57.72%)             | 803 (55.42%)                   | 195 (69.64%)                   | <0.0001 |
| Dyslipidemia                                        | 441 (25.51%)             | 348 (24.02%)                   | 93 (33.21%)                    | 0.0012  |
| Current smoker                                      | 410 (23.71%)             | 357 (24.64%)                   | 53 (18.93%)                    | 0.0398  |
| Overweight                                          | 226 (13.07%)             | 204 (14.08%)                   | 22 (7.86%)                     | 0.0047  |
| Coronary artery disease                             | 263 (15.21%)             | 209 (14.42%)                   | 54 (19.29%)                    | 0.0381  |
| Atrial fibrillation                                 | 527 (30.48%)             | 433 (29.88%)                   | 94 (33.57%)                    | 0.2198  |
| Classification of stroke etiologic subtypes (TOAST) |                          |                                |                                |         |
| Large artery                                        | 578 (33.43%)             | 479 (33.06%)                   | 99 (35.36%)                    | 0.4552  |
| Cardioembolic                                       | 563 (32.56%)             | 469 (32.37%)                   | 94 (33.57%)                    | 0.6938  |
| Lacunar stroke                                      | 153 (8.85%)              | 129 (8.90%)                    | 24 (8.57%)                     | 0.8582  |
| Other determined etiology                           | 43 (2.49%)               | 40 (2.76%)                     | 3 (1.07%)                      | 0.0966  |
| Undetermined etiology                               | 392 (22.67%)             | 332 (22.91%)                   | 60 (21.43%)                    | 0.5872  |
| Hospitalization in stroke unit                      | 620 (35.86%)             | 546 (37.68%)                   | 74 (26.43%)                    | 0.0003  |

**Table 1: Baseline characteristics of patients with ischemic stroke (incident and recurrent) hospitalized in Nice University Hospital from 2007 to 2011.**

|                                                          | Mean  | SD    | Minimum | Quartile 1 | Median | Quartile 3 | Maximum |
|----------------------------------------------------------|-------|-------|---------|------------|--------|------------|---------|
| Ozone daily 8-hours average ( $\mu\text{g}/\text{m}^3$ ) | 80.74 | 31.78 | 4.63    | 54.75      | 84.38  | 105.38     | 157.27  |
| Ozone daily 1-hour maximum ( $\mu\text{g}/\text{m}^3$ )  | 92.37 | 31.32 | 7.00    | 69.00      | 94.00  | 115.00     | 197.00  |
| Ozone 24-hours average ( $\mu\text{g}/\text{m}^3$ )      | 52.20 | 22.89 | 4.00    | 32.58      | 53.29  | 69.02      | 111.13  |
| PM10 ( $\mu\text{g}/\text{m}^3$ )                        | 28.48 | 9.81  | 1.00    | 22.00      | 28.00  | 34.00      | 74.00   |
| NO <sub>2</sub> ( $\mu\text{g}/\text{m}^3$ )             | 26.22 | 8.69  | 3.00    | 20.00      | 25.00  | 32.00      | 59.00   |
| SO <sub>2</sub> ( $\mu\text{g}/\text{m}^3$ )             | 1.23  | 1.18  | 0.00    | 0.00       | 1.00   | 2.00       | 10.00   |
| Minimum temperature ( $^{\circ}\text{C}$ )               | 13.02 | 5.98  | -1.60   | 7.80       | 12.90  | 18.20      | 25.90   |
| Maximum humidity (%)                                     | 81.40 | 9.07  | 40.00   | 76.00      | 83.00  | 88.00      | 97.00   |

**Table 2: Distribution of air pollution concentrations and meteorological parameters in Nice (France) between 2007 to 2012.**

|       |             |             | All ischemic stroke (n=1729) |                  |        | Recurrent stroke (n=280) |                  |        | Large artery stroke (n=578) |                  |       |
|-------|-------------|-------------|------------------------------|------------------|--------|--------------------------|------------------|--------|-----------------------------|------------------|-------|
|       |             |             | Ora                          | 95% IC           | p      | Ora                      | 95% IC           | p      | Ora                         | 95% IC           | p     |
| Ozone | D-1         | 8h average  | 0.9917                       | 0.9584 to 1.0261 | 0.633  | 1.0899                   | 1.0009 to 1.1867 | 0.047  | 0.9697                      | 0.9119 to 1.0310 | 0.326 |
|       |             | 1h maximum  | 0.9957                       | 0.9644 to 1.0281 | 0.795  | 1.0641                   | 0.9824 to 1.1527 | 0.127  | 0.9881                      | 0.9334 to 1.0460 | 0.682 |
|       |             | 24h average | 1.0036                       | 0.9578 to 1.0517 | 0.877  | 1.0793                   | 0.9616 to 1.2115 | 0.195  | 0.9983                      | 0.9190 to 1.0843 | 0.968 |
|       | D-2         | 8h average  | 0.9976                       | 0.9657 to 1.0306 | 0.888  | 1.0957                   | 1.0086 to 1.1903 | 0.030  | 0.9903                      | 0.9347 to 1.0491 | 0.741 |
|       |             | 1h maximum  | 1.0040                       | 0.9738 to 1.0351 | 0.795  | 1.0955                   | 1.0144 to 1.1831 | 0.020  | 0.9979                      | 0.9457 to 1.0529 | 0.940 |
|       |             | 24h average | 1.0015                       | 0.9598 to 1.0451 | 0.942  | 1.0638                   | 0.9587 to 1.1804 | 0.244  | 1.0097                      | 0.9365 to 1.0885 | 0.801 |
|       | D-3         | 8h average  | 0.9987                       | 0.9670 to 1.0314 | 0.939  | 1.0601                   | 0.9784 to 1.1487 | 0.154  | 1.0261                      | 0.9703 to 1.0852 | 0.366 |
|       |             | 1h maximum  | 0.9968                       | 0.9671 to 1.0273 | 0.836  | 1.0380                   | 0.9635 to 1.1184 | 0.326  | 1.0254                      | 0.9728 to 1.0808 | 0.349 |
|       |             | 24h average | 1.0046                       | 0.9644 to 1.0466 | 0.822  | 1.0838                   | 0.9788 to 1.2000 | 0.122  | 1.0519                      | 0.9802 to 1.1289 | 0.160 |
| D-4   | 8h average  | 1.0067      | 0.9751 to 1.0393             | 0.681            | 1.0169 | 0.9395 to 1.1006         | 0.678            | 1.0359 | 0.9808 to 1.0941            | 0.205            |       |
|       | 1h maximum  | 0.9978      | 0.9684 to 1.0280             | 0.887            | 1.0038 | 0.9321 to 1.0811         | 0.918            | 1.0290 | 0.9777 to 1.0829            | 0.272            |       |
|       | 24h average | 1.0114      | 0.9711 to 1.0534             | 0.583            | 1.0248 | 0.9260 to 1.1342         | 0.635            | 1.0787 | 1.0065 to 1.1561            | 0.032            |       |
| PM10  | D-1         |             | 1.0143                       | 0.9518 to 1.0806 | 0.659  | 1.0041                   | 0.5586 to 1.7995 | 0.989  | 1.0347                      | 0.9282 to 1.1527 | 0.536 |
|       | D-2         |             | 0.9861                       | 0.9238 to 1.0523 | 0.674  | 0.9518                   | 0.8106 to 1.1167 | 0.545  | 0.9350                      | 0.8349 to 1.0464 | 0.242 |
|       | D-3         |             | 0.9788                       | 0.9203 to 1.0405 | 0.493  | 1.0047                   | 0.8532 to 1.182  | 0.955  | 0.9436                      | 0.8475 to 1.0501 | 0.288 |
|       | D-4         |             | 0.9780                       | 0.9202 to 1.0391 | 0.473  | 0.9911                   | 0.8520 to 1.152  | 0.908  | 0.9544                      | 0.8572 to 1.0620 | 0.392 |
| NO2   | D-1         |             | 1.0307                       | 0.9367 to 1.1336 | 0.533  | 0.8960                   | 0.7689 to 1.0434 | 0.158  | 1.0293                      | 0.8699 to 1.2169 | 0.735 |
|       | D-2         |             | 0.9931                       | 0.9029 to 1.0918 | 0.887  | 0.9427                   | 0.7403 to 1.1991 | 0.631  | 1.0494                      | 0.8894 to 1.2372 | 0.565 |
|       | D-3         |             | 0.9462                       | 0.8607 to 1.0396 | 0.250  | 1.1262                   | 0.8767 to 1.4449 | 0.349  | 0.9147                      | 0.7743 to 1.0796 | 0.292 |
|       | D-4         |             | 0.9462                       | 0.8607 to 1.0396 | 0.250  | 0.8931                   | 0.7047 to 1.1306 | 0.348  | 0.9147                      | 0.7743 to 1.0796 | 0.292 |
| SO2   | D-1         |             | 1.0069                       | 0.5986 to 1.6893 | 0.979  | 0.653                    | 0.164 to 2.5822  | 0.544  | 1.0789                      | 0.4507 to 2.5712 | 0.864 |
|       | D-2         |             | 0.8763                       | 0.5138 to 1.4905 | 0.626  | 0.8916                   | 0.2525 to 3.1284 | 0.858  | 1.1784                      | 0.4790 to 2.8858 | 0.719 |
|       | D-3         |             | 1.2539                       | 0.7405 to 2.1174 | 0.397  | 0.7231                   | 0.1983 to 2.6188 | 0.622  | 0.9351                      | 0.3630 to 2.3973 | 0.889 |
|       | D-4         |             | 1.4852                       | 0.8956 to 2.4567 | 0.123  | 1.3587                   | 0.3735 to 4.9101 | 0.640  | 1.6564                      | 0.7140 to 3.8260 | 0.237 |

**Table 3: Adjusted odds ratios between ischemic stroke and outdoor pollutants exposure for an increase of 10 µg/m<sup>3</sup> in Nice (France) between 2007 to 2011.**

1  
2  
3  
4  
5  
6  
7  
8  
9  
10  
11  
12  
13  
14  
15  
16  
17  
18  
19  
20  
21  
22  
23  
24  
25  
26  
27  
28  
29  
30  
31  
32  
33  
34  
35  
36  
37  
38  
39  
40  
41  
42  
43  
44  
45  
46  
47  
48  
49  
50  
51  
52  
53  
54  
55  
56  
57  
58  
59  
60

For peer review only



1  
2  
3 **Title page**  
4

5  
6 **Ozone air pollution and ischemic stroke occurrence: a case-crossover study in Nice,**  
7  
8 **France.**  
9

10  
11 SUISSA Laurent<sup>1</sup>, MD ; FORTIER Mikael<sup>2</sup>, MD ; LACHAUD Sylvain<sup>1</sup>, MD ; STACCINI  
12  
13 Pascal<sup>3</sup>, MD, PhD ; MAHAGNE Marie-Hélène<sup>1</sup>, MD, PhD.  
14

15  
16 <sup>1</sup> Stroke Center - University Hospital of Nice – Nice, France.  
17

18  
19 <sup>2</sup> Department of Emergency Medecine – University Hospital of Nice – Nice, France.  
20

21  
22 <sup>3</sup> Department of Medical Information – University Hospital of Nice – Nice, France.  
23  
24

25 **Corresponding author and address for reprints:**  
26

27  
28 Dr SUISSA Laurent - Hospital Saint-Roch – Unité Neurovasculaire - 5, rue Pierre Devoluy –  
29  
30 06000 NICE – France.  
31

32  
33  
34 Phone : 0033492032720 – Fax : 0033492032721 – Mail : [suissa.laurent@free.fr](mailto:suissa.laurent@free.fr)  
35

36  
37 **Cover title:** Ozone air pollution and ischemic stroke occurrence  
38

39  
40 **Keywords:** Ischemic stroke; Outdoor air pollution; Ozone; Vascular risk factors.  
41

42  
43 **Words count:** 2000  
44  
45  
46  
47  
48  
49  
50  
51  
52  
53  
54  
55  
56  
57  
58  
59  
60

**Abstract**

Objectives: Relationship between low level air pollution and stroke are conflicting. This study was conducted to document the relationship between outdoor air pollution and ischemic stroke occurrence.

Methods: We studied the association between daily levels of outdoor pollutants (ozone (O<sub>3</sub>), nitrogen dioxide (NO<sub>2</sub>), particulate matter (PM<sub>10</sub>) and sulphur dioxide (SO<sub>2</sub>)) and ischemic stroke occurrence (Hospital registry) using a 5 years (2007-2011) time-stratified case-crossover analysis in Nice (France). The short-term effects on stroke occurrence for every 10 µg/m<sup>3</sup> increase in each pollutant was calculated using conditional logistic regression model adjusted for temperature, humidity, flu and holidays.

Results: **We enrolled 1729 ischemic stroke patients (mean age: 76.1±14.0 years; men: 46.7%).**

No significant association was found between stroke occurrence and short term effects of all pollutants tested. In stratified analysis, we observed significant associations only between recurrent (n=280) and large artery ischemic stroke (n=578) onset and short term effect of ozone exposure. For an increase of 10 µg/m<sup>3</sup> of ozone level, recurrent stroke risk (mean D-1, D-2, D-3 lag) was increased by 12.1% (95% CI 1.5 to 23.9) and large artery stroke risk (mean D-3, D-4 lag) was increased by 8.0% (95% CI 2.0 to 16.6). Linear dose-response relationship for both subgroups was found.

Conclusions: Our results confirm the relationship between low level ozone exposure and ischemic stroke in high vascular risk subgroup with linear exposure-response relation, independently of other pollutants and meteorological parameters.

1  
2  
3 **Strengths and limitations of this study:** Relationship between low level air pollution and  
4 stroke are conflicting. This paper confirm the relationship between low level ozone exposure  
5 and ischemic stroke in high vascular risk subgroup with linear exposure-response relation,  
6  
7 independently of other pollutants and meteorological parameters. PM2.5 was not studied  
8  
9 because not monitored in Nice.  
10  
11  
12  
13  
14  
15  
16  
17  
18  
19  
20  
21  
22  
23  
24  
25  
26  
27  
28  
29  
30  
31  
32  
33  
34  
35  
36  
37  
38  
39  
40  
41  
42  
43  
44  
45  
46  
47  
48  
49  
50  
51  
52  
53  
54  
55  
56  
57  
58  
59  
60

For peer review only

## Main Text

### INTRODUCTION

Outdoor air pollution is considered as a major environmental health issue, responsible for an excess of death in the world. It is defined as any undesirable modification of air by substances either toxic or likely to have adverse effects on health. Outdoor air pollutants are known to increase morbidity and mortality of respiratory diseases [1]. However, in the 1950's and 1960's, epidemiological studies of acute severe pollution episodes have also shown an increasing cardiovascular and cerebrovascular mortality risk [2]. A link between acute air pollution and stroke mortality has been reported for the first time in the London fog incident study in December 1952 [2]. In the last decades, the consequences of low-level air pollution on cardiovascular mortality and morbidity have been clearly described [3-6]. By analogy, few studies have examined the role of short-term air pollution on ischemic stroke but actually no conclusion could be generalized [3, 5-24]. The purpose of the present study was to document the relationship between the characteristics of outdoor air pollution and the occurrence of ischemic stroke.

### MATERIALS AND METHODS

#### *Population studied*

We performed a 5 years (2007-2011) case-crossover analysis in Nice, France. We retrospectively enrolled consecutive stroke patients admitted at the University Hospital of Nice between January 2007 and December 2011. Querying French DRG based database (PMSI: Programme de Médicalisation des Systèmes d'Information) with I60 to I69 codes from the International Classification of Diseases (10<sup>th</sup> Revision), we screened all patients

1  
2  
3 hospitalized for stroke. We filtered the sample to patients living in Nice (geographic area  
4 defined by zip codes: 06000, 06100, 06200 and 06300). The diagnosis of ischemic stroke was  
5 reviewed and confirmed by a panel of neurologists using clinical and radiological data of  
6  
7  
8  
9  
10  
11  
12  
13  
14  
15  
16  
17  
18  
19  
20  
21  
22  
23  
24  
25  
26  
27  
28  
29  
30  
31  
32  
33  
34  
35  
36  
37  
38  
39  
40  
41  
42  
43  
44  
45  
46  
47  
48  
49  
50  
51  
52  
53  
54  
55  
56  
57  
58  
59  
60

hospitalized for stroke. We filtered the sample to patients living in Nice (geographic area defined by zip codes: 06000, 06100, 06200 and 06300). The diagnosis of ischemic stroke was reviewed and confirmed by a panel of neurologists using clinical and radiological data of medical records. Patients with another diagnosis than stroke were excluded. Demographic data, vascular risk factors (WHO definitions), clinical and radiological characteristics of stroke were also collected from medical records.

### ***Outdoor air pollution and meteorological data***

Nice is an urban city situated in the south-eastern part of France on the Mediterranean coast. According to the latest census, Nice has a population of 340 735 in 2009. Its climate is temperate and qualified as Mediterranean type. Surrounded by hills and mountains (south Alps), the city of Nice is sheltered from continuous of violent winds. Outdoor air pollution comes mainly from traffic due to high density of roads and international airport (first one in France after Paris airports).

Air pollution data were obtained from the regional agency for air quality monitoring (AirPACA). Exposure measurements during the study period were carried out in 2 of 13 permanent monitoring stations in study area. Measures ( $\mu\text{g}/\text{m}^3$ ) were performed in urban station (Cagnes Ladoumègue) for following atmospheric pollutants: particulate matter (PM10) (Tapered Element Oscillating Microbalance), nitrogen dioxide (NO<sub>2</sub>) (chemiluminescence), sulphur dioxide (SO<sub>2</sub>) (ultraviolet photometry), and ozone (O<sub>3</sub>) (ultraviolet photometry). Missing values were replaced by measures performed by the observational monitoring station located at Nice Airport. We computed for each pollutant 24-hours average and specifically for ozone 8-hours daytime periods.

1  
2  
3 Daily meteorological data were obtained from the National Meteorological Office of Nice  
4 including temperature (° Celcius) and humidity (%). Moreover, data on influenza epidemics  
5 (weekly count) in region of Provence-Alpes-Cote-d'Azur were obtained from Sentiweb  
6 network.  
7  
8  
9  
10

### 11 *Statistical analysis*

12  
13  
14  
15 Continuous variables were expressed as mean (standard deviation [SD]) or median  
16 (interquartile range [IQR]), and categorical variables as percentages. Spearman correlation  
17 coefficients (r) between air pollutants and atmospheric parameters were calculated. The time-  
18 stratified case-crossover design was used to examine the relationship between short-term  
19 effects of outdoor air pollutants and stroke. In this design, each subject enrolled was his own  
20 control. Case days were defined as the day of stroke. Control days were defined as the same  
21 day of the same stratum as the case day. Study time was stratified by months. Therefore,  
22 explicative variables levels at the case day were compared to levels of the same variables at  
23 control days. This method has the main advantage to control individual factors, the day of the  
24 week, season, time trend [24]. Conditional logistic regression was performed to estimate the  
25 association between short-term effects of each air pollutants measured and stroke onset. Odds  
26 ratio v (OR) and 95% confidence intervals (CI) for a 10 µg/m<sup>3</sup> increase of pollutant level were  
27 adjusted for temperature and humidity with 1-day lag, influenza epidemics and holidays  
28 without day lag. The pollutant exposure was tested in models for 1-day lag, 2-day lag, or 3-  
29 day lag. Stratified analyses by subgroups were performed according to age, gender, risk  
30 vascular factors (tobacco use, diabetes mellitus, hypercholesterolemia, hypertension), and  
31 stroke etiological subtypes according the Trial of ORG 10172 in acute stroke treatment  
32 (TOAST). We evaluated dose-response relationships across four exposure levels of pollutant  
33  
34  
35  
36  
37  
38  
39  
40  
41  
42  
43  
44  
45  
46  
47  
48  
49  
50  
51  
52  
53  
54  
55  
56  
57  
58  
59  
60

1  
2  
3 studied and the first quartile was used as the reference group. A p-value less than 0.05 was  
4  
5 considered as significant. The data were analyzed using Stata 10.0 SE software.  
6  
7

## 8 **RESULTS**

9  
10  
11 During the study period (January 2007 to December 2011), there were 2067 patients living  
12  
13 Nice and admitted in University Hospital Center for ischemic stroke based on DRG database.  
14  
15 After neurologists review of medical records, 1729 ischemic stroke patients were enrolled for  
16  
17 final analysis. 620 (35.9%) of these patients were hospitalized in stroke unit. According to the  
18  
19 last population census 2009, annual ischemic stroke incidence rates (by 100.000) in studied  
20  
21 area were respectively from 2007 to 2011: 100, 100, 98, 96 and 112. Mean age was 76.1±14.0  
22  
23 years, and 46.7% were men (Table 1).  
24  
25

26  
27 The distribution of air pollutants and meteorological variables is shown in Table 2. Spearman  
28  
29 correlation coefficients (r) were ranged from 0.01 to 0.25 between each studied pollutants,  
30  
31 except between O<sub>3</sub> and NO<sub>2</sub> (r=-0.54). Correlation coefficient between minimal temperature  
32  
33 and O<sub>3</sub> was r=0.67 (Online only data supplement Table I).  
34  
35

36  
37 No significant association was found between stroke occurrence and short term effects of all  
38  
39 pollutants tested. In addition, we performed stratified subgroup analysis according to gender,  
40  
41 age by decade, incident/recurrent stroke status, vascular risk factors, presence of atrial  
42  
43 fibrillation, stroke etiological subgroups. We observed significant associations only between  
44  
45 recurrent (n=280) and large artery ischemic stroke (n=578) onset and short-term effect of  
46  
47 ozone with (Table 3). In recurrent stroke subgroup, for an increase of 10 µg/m<sup>3</sup> of ozone level  
48  
49 (mean D-1, D-2, D-3 lag), stroke risk was significantly increased by 12.1% (95% CI 1.5 to  
50  
51 23.9). Adjusted OR between ozone exposure (mean D-3, D-4) and large artery stroke  
52  
53 subgroup was 1.080 (95% CI 1.002 to 1.166). No significant association was observed with  
54  
55  
56  
57  
58  
59  
60

1  
2  
3 other pollutants than ozone. Adjusted in two-pollutant models, OR were not affected. Using  
4  
5 ozone quartiles (1<sup>st</sup> quartile as the reference group), linear dose-response relationship for both  
6  
7 subgroups was observed (Figure 1). Baseline characteristics in recurrent stroke subgroup and  
8  
9 large artery stroke subgroup were shown in Figure 2.  
10

## 11 12 **DISCUSSION**

13  
14  
15 Our study assessed the short-term effect of ozone exposure on selected population of ischemic  
16  
17 stroke in a city specially polluted by ozone. An elevation of 10 µg/m<sup>3</sup> of ozone concentration  
18  
19 increases stroke risk with few days lag in recurrent (≈12%) and large artery stroke (≈8%)  
20  
21 subgroups only. Linear dose-response relation was observed systematically in both groups. In  
22  
23 these groups, the common feature of the patients was that they cumulate vascular risk factors.  
24  
25 No significant association was found between all ischemic stroke groups and atmospheric  
26  
27 pollutants studied (O<sub>3</sub>, NO<sub>2</sub>, SO<sub>2</sub> and PM10).  
28  
29

30  
31  
32 Several studies have investigated the association between outdoor air pollution and stroke [3,  
33  
34 5-24]. Results of these studies are conflicting and hamper generalization of conclusions.  
35  
36 Heterogeneous methodological considerations are the main explanation of this conflict.  
37  
38 Methodological differences are observed in patient selection, study design, outcomes choice  
39  
40 (incidence, hospital admission, mortality), and assessment of individual exposure to selected  
41  
42 pollutants [20]. Few published studies investigated specially the association between  
43  
44 occurrence of ischemic stroke and ozone exposure using case crossover design [8, 15, 17, 19,  
45  
46 21] or time series analysis method [3, 12, 16, 22]. Consistent with our results, the majority of  
47  
48 these studies do not observe relationship between ozone exposure and occurrence of ischemic  
49  
50 stroke [3, 8, 17, 19, 21, 22]. Whenever relationship was revealed, association was borderline  
51  
52 significant [16], or not confirmed by a second study on the same area of investigation [15,  
53  
54 19]. Despite the fact that the link between ischemic stroke and ozone exposure is not obvious,  
55  
56  
57  
58  
59  
60



1  
2  
3 results in subgroup analyses seem to identify a population at risk for ozone exposure. In  
4  
5 recurrent ischemic stroke subgroup, a significant increase of 12.1% (95% CI 1.5 to 23.9) in  
6  
7 stroke risk was observed for each increase of 10  $\mu\text{g}/\text{m}^3$  of ozone concentration in previous  
8  
9 days (mean D-1, D-2, D-3 lag). Consistent with this result, population-based study in Dijon  
10  
11 (France), revealed the same association (OR: 1.150; 95% CI 1.027 to 1.209) with 3 days lag  
12  
13 [19]. Similarly, a significant association was observed in large artery stroke subgroup (mean  
14  
15 D-3, D-4, OR: 1.080; 95% CI 1.002 to 1.166). This link was observed in previous study  
16  
17 (Dijon) especially in this stroke etiological subgroup [15]. Associations in other ischemic  
18  
19 stroke subgroups are not systematically confirmed (age, gender, vascular risk factors, and  
20  
21 season) [3, 15, 19, 21, 22]. Our study confirms the short-term effects of ozone exposure on  
22  
23 stroke patients with high vascular risk [15, 19].  
24  
25  
26  
27

28 Our findings suggest that exposure to ozone, main photochemical pollutant, could increase the  
29  
30 risk of ischemic stroke in population subgroups (recurrent stroke, large arteries stroke)  
31  
32 particularly exposed to vascular risks factors inducing atherosclerosis. Physiopathological  
33  
34 pathways linking ischemic stroke and ozone exposure still remain largely unclear and  
35  
36 probably complex. Some studies support a delayed effect (1 to 3 days lag) between acute  
37  
38 exposure of ozone pollution and stroke onset [15, 19]. Ozone urban pollution effects on  
39  
40 healthy subjects are associated with systemic inflammatory responses, oxidative stress, blood  
41  
42 coagulation [25, 26]. These acute phenomena induced by even low levels of ozone could be  
43  
44 the trigger of ischemic event consecutively to atherosclerotic plaque instability, alterations in  
45  
46 endothelial function, and increased coagulation and thrombosis [27]. As suggested by  
47  
48 Henrotin et al., we hypothesized that short term effect of ozone exposure could be involved  
49  
50 especially among subjects with high vascular risk [19].  
51  
52  
53  
54  
55  
56  
57  
58  
59  
60

1  
2  
3 In order to establish a causal relationship between ozone exposure and stroke onset, we  
4  
5 studied the exposure-response relation, main criteria identified by Hill [28]. Consistent with  
6  
7 previous reports, we show a linear exposure-response relationship between ozone  
8  
9 concentration and ischemic stroke in subgroups identified in previous reports [15, 19].  
10

11  
12 Our study has several limitations. **The question of completeness of stroke patients living Nice**  
13 **in this hospital-based study was discussed.** In Nice, patients with suspicion of stroke are  
14  
15 admitted in priority in University Hospital Center. Likewise, incidence of ischemic stroke was  
16  
17 consistent with epidemiological data in France. The question of individual exposure  
18  
19 measurement is generally discussed. The main limit is that we used air pollution levels from  
20  
21 air monitoring station to represent individuals' exposure. However, we limited our  
22  
23 investigations in small geographic area (72 km<sup>2</sup>) not considered as a polluted town except for  
24  
25 ozone (median 53.3 [32.6-69.2] µg/m<sup>3</sup>). Moreover, in the stroke population studied, elderly  
26  
27 patients are mostly retired and have daily activity in study area. Since ozone concentration is  
28  
29 correlated with meteorological parameters, temperature and humidity were incorporated into  
30  
31 our models. Association between ozone pollution and stroke can be confounded by other  
32  
33 pollutants studied, especially particles. Effects of ozone alone are not modified using adjusted  
34  
35 models for each of the other pollutants (NO<sub>2</sub>, SO<sub>2</sub> and PM<sub>10</sub>). PM<sub>2.5</sub> was not studied  
36  
37 because not monitored in Nice.  
38  
39  
40  
41  
42  
43  
44

## 45 SUMMARY

46  
47 The consequences of ozone pollution on respiratory system and mortality are well  
48  
49 documented [1]. Our results confirm the relationship between low level ozone exposure and  
50  
51 ischemic stroke in high vascular risk subgroup with linear exposure-response relation,  
52  
53 independently of other pollutants and meteorological parameters. Reproducibility of previous  
54  
55 results is one of the main Hills criterion to induce causality of ozone exposure. Even if the  
56  
57  
58  
59  
60

1  
2  
3 individual risk is low, to identify an association between ozone and ischemic stroke incidence  
4  
5 is important from a public health point of view, since a large population is concerned.  
6  
7 Physiopathological processes underlying this association between ischemic stroke and ozone  
8  
9 exposure remain to be investigated.  
10  
11  
12  
13  
14  
15  
16  
17  
18  
19  
20  
21  
22  
23  
24  
25  
26  
27  
28  
29  
30  
31  
32  
33  
34  
35  
36  
37  
38  
39  
40  
41  
42  
43  
44  
45  
46  
47  
48  
49  
50  
51  
52  
53  
54  
55  
56  
57  
58  
59  
60

For peer review only

**Acknowledgments:**

The authors thank AirPACA association and Sentiweb network who provided respectively daily measures of outdoor air pollution and data on influenza epidemics in region of Provence-Alpes-Cote-d'Azur.

For peer review only

1  
2  
3 **Source of Funding:**  
4

5  
6 None  
7  
8  
9  
10  
11  
12  
13  
14  
15  
16  
17  
18  
19  
20  
21  
22  
23  
24  
25  
26  
27  
28  
29  
30  
31  
32  
33  
34  
35  
36  
37  
38  
39  
40  
41  
42  
43  
44  
45  
46  
47  
48  
49  
50  
51  
52  
53  
54  
55  
56  
57  
58  
59  
60

For peer review only

1  
2  
3  
4  
5  
6  
7  
8  
9  
10  
11  
12  
13  
14  
15  
16  
17  
18  
19  
20  
21  
22  
23  
24  
25  
26  
27  
28  
29  
30  
31  
32  
33  
34  
35  
36  
37  
38  
39  
40  
41  
42  
43  
44  
45  
46  
47  
48  
49  
50  
51  
52  
53  
54  
55  
56  
57  
58  
59  
60

**Conflict(s)-of-Interest/Disclosure(s):**

None.

For peer review only

**Reference list**

- [1] Brunekreef B, Holgate ST. Air pollution and health. *Lancet* 2002;360:1233-1242.
- [2] Logan WP. Mortality in the London fog incident, 1952. *Lancet* 1953;1:336-338.
- [3] Ponka A, Virtanen M. Low-level air pollution and hospital admissions for cardiac and cerebrovascular diseases in Helsinki. *Am J Public Health* 1996;86:1273-1280.
- [4] Samet JM, Dominici F, Curriero FC, et al. Fine particulate air pollution and mortality in 20 U.S. cities, 1987-1994. *N Engl J Med* 2000;343:1742-1749.
- [5] Zeller M, Giroud M, Royer C, et al. Air pollution and cardiovascular and cerebrovascular disease: Epidemiologic data. *Presse Med* 2006;35:1517-1522.
- [6] Larrieu S, Jusot JF, Blanchard M, et al. Short term effects of air pollution on hospitalizations for cardiovascular diseases in eight French cities: the PSAS program. *Sci Total Environ* 2007;387:105-112.
- [7] Hong YC, Lee JT, Kim H, et al. Air pollution: a new risk factor in ischemic stroke mortality. *Stroke* 2002;33:2165-2169.
- [8] Tsai SS, Goggins WB, Chiu HF, et al. Evidence for an association between air pollution and daily stroke admissions in Kaohsiung, Taiwan. *Stroke* 2003;34:2612-2616.
- [9] Wellenius GA, Schwartz J, Mittleman MA. Air pollution and hospital admissions for ischemic and hemorrhagic stroke among medicare beneficiaries. *Stroke* 2005;36:2549-2553.

- 1  
2  
3 [10] Maheswaran R, Haining RP, Brindley P, et al. Outdoor air pollution and stroke in  
4 Sheffield, United Kingdom: a small-area level geographical study. *Stroke*  
5 2005;36:239-243.  
6  
7  
8  
9  
10 [11] Low RB, Bielory L, Qureshi AI, et al. The relation of stroke admissions to recent  
11 weather, airborne allergens, air pollution, seasons, upper respiratory infections, and  
12 asthma incidence, September 11, 2001, and day of the week. *Stroke* 2006;37:951-957.  
13  
14  
15 [12] Chan CC, Chuang KJ, Chien LC, et al. Urban air pollution and emergency admissions  
16 for cerebrovascular diseases in Taipei, Taiwan. *Eur Heart J* 2006;27:1238-1244.  
17  
18 [13] Ballester F, Rodriguez P, Iniguez C, et al. Air pollution and cardiovascular admissions  
19 association in Spain: results within the EMECAS project. *J Epidemiol Community*  
20 *Health* 2006;60:328-336.  
21  
22  
23 [14] Kettunen J, Lanki T, Tiittanen P, et al. Associations of fine and ultrafine particulate air  
24 pollution with stroke mortality in an area of low air pollution levels. *Stroke*  
25 2007;38:918-922.  
26  
27  
28  
29  
30 [15] Henrotin JB, Besancenot JP, Bejot Y, et al. Short-term effects of ozone air pollution  
31 on ischaemic stroke occurrence: a case-crossover analysis from a 10-year population-  
32 based study in Dijon, France. *Occup Environ Med* 2007;64:439-445.  
33  
34  
35  
36  
37  
38 [16] Lisabeth LD, Escobar JD, Dvorchak JT, et al. Ambient air pollution and risk for  
39 ischemic stroke and transient ischemic attack. *Ann Neurol* 2008;64:53-59.  
40  
41  
42  
43  
44  
45 [17] Oudin A, Stromberg U, Jakobsson K, et al. Estimation of short-term effects of air  
46 pollution on stroke hospital admissions in southern Sweden. *Neuroepidemiology*  
47 2010;34:131-142.  
48  
49  
50  
51  
52  
53  
54  
55  
56  
57  
58  
59  
60



- 1  
2  
3 [18] Maheswaran R, Pearson T, Smeeton NC, et al. Impact of outdoor air pollution on  
4 survival after stroke: population-based cohort study. *Stroke* 2010;41:869-877.  
5  
6  
7  
8 [19] Henrotin JB, Zeller M, Lorgis L, et al. Evidence of the role of short-term exposure to  
9 ozone on ischaemic cerebral and cardiac events: the Dijon Vascular Project (DIVA).  
10 *Heart* 2010;96:1990-1996.  
11  
12  
13 [20] Hennerici MG. Report of the 20th European Stroke Conference, Hamburg, May 24-  
14 27, 2011. *Cerebrovasc Dis* 2011;32:589-613.  
15  
16  
17 [21] Mechtouff L, Canoui-Poitrine F, Schott AM, et al. Lack of association between air  
18 pollutant exposure and short-term risk of ischaemic stroke in Lyon, France. *Int J*  
19 *Stroke* 2012.  
20  
21  
22 [22] Maheswaran R, Pearson T, Smeeton NC, et al. Outdoor air pollution and incidence of  
23 ischemic and hemorrhagic stroke: a small-area level ecological study. *Stroke*  
24 2012;43:22-27.  
25  
26  
27 [23] Chen R, Zhang Y, Yang C, et al. Acute effect of ambient air pollution on stroke  
28 mortality in the China air pollution and health effects study. *Stroke* 2013;44:954-960.  
29  
30  
31 [24] Xu X, Sun Y, Ha S, et al. Association between Ozone Exposure and Onset of Stroke  
32 in Allegheny County, Pennsylvania, USA, 1994-2000. *Neuroepidemiology* 2013;41:2-  
33 6.  
34  
35  
36 [25] Chuang KJ, Chan CC, Su TC, et al. The effect of urban air pollution on inflammation,  
37 oxidative stress, coagulation, and autonomic dysfunction in young adults. *Am J Respir*  
38 *Crit Care Med* 2007;176:370-376.  
39  
40  
41  
42  
43  
44  
45  
46  
47  
48  
49  
50  
51  
52  
53  
54  
55  
56  
57  
58  
59  
60

- 1  
2  
3 [26] Jang AS, Choi IS, Yang SY, et al. Antioxidant responsiveness in BALB/c mice  
4 exposed to ozone. *Respiration* 2005;72:79-84.  
5  
6  
7  
8 [27] O'Neill MS, Veves A, Zanobetti A, et al. Diabetes enhances vulnerability to  
9 particulate air pollution-associated impairment in vascular reactivity and endothelial  
10 function. *Circulation* 2005;111:2913-2920.  
11  
12  
13  
14  
15 [28] Dab W, Segala C, Dor F, et al. Air pollution and health: correlation or causality? The  
16 case of the relationship between exposure to particles and cardiopulmonary mortality.  
17  
18  
19  
20 *J Air Waste Manag Assoc* 2001;51:220-235.  
21  
22  
23  
24  
25  
26  
27  
28  
29  
30  
31  
32  
33  
34  
35  
36  
37  
38  
39  
40  
41  
42  
43  
44  
45  
46  
47  
48  
49  
50  
51  
52  
53  
54  
55  
56  
57  
58  
59  
60

## Figure Legends

Figure 1: Dose relationship between ozone and ischemic stroke events (1A Recurrent ischemic stroke subgroup, 1B Large artery ischemic stroke subgroup).

Figure 2: Baseline characteristics according recurrent stroke subgroup (A) and large artery stroke subgroup (B) (\*:  $p < .05$ ).

For peer review only

## Tables

|                                                     | All patients<br>(n=1729) | Incident<br>n=1449<br>(83.81%) | Recurrent<br>n=280<br>(16.19%) | p       |
|-----------------------------------------------------|--------------------------|--------------------------------|--------------------------------|---------|
| Demographic data                                    |                          |                                |                                |         |
| Men                                                 | 808 (46.73%)             | 683 (47.14%)                   | 125 (44.64%)                   | 0.0044  |
| Age                                                 | 76.06±14.04              | 75.48±14.29                    | 79.01±12.33                    | <0.0001 |
| < 55 years                                          | 141 (8.16%)              | 132 (9.11%)                    | 9 (3.21%)                      | 0.0011  |
| 55 to 64 years                                      | 186 (10.76%)             | 155 (10.70%)                   | 31 (11.07%)                    | 0.8532  |
| 65 to 74 years                                      | 324 (18.74%)             | 279 (19.25%)                   | 45 (16.07%)                    | 0.2114  |
| 75 to 84 years                                      | 524 (30.31%)             | 438 (30.23%)                   | 86 (30.71%)                    | 0.8712  |
| ≥ 85 years                                          | 554 (32.04%)             | 445 (30.71%)                   | 109 (38.93%)                   | 0.0071  |
| Cardiovascular risk factors                         |                          |                                |                                |         |
| Diabetes mellitus                                   | 311 (17.99%)             | 249 (17.18%)                   | 62 (22.14%)                    | 0.0481  |
| Hypertension                                        | 998 (57.72%)             | 803 (55.42%)                   | 195 (69.64%)                   | <0.0001 |
| Dyslipidemia                                        | 441 (25.51%)             | 348 (24.02%)                   | 93 (33.21%)                    | 0.0012  |
| Current smoker                                      | 410 (23.71%)             | 357 (24.64%)                   | 53 (18.93%)                    | 0.0398  |
| Overweight                                          | 226 (13.07%)             | 204 (14.08%)                   | 22 (7.86%)                     | 0.0047  |
| Coronary artery disease                             | 263 (15.21%)             | 209 (14.42%)                   | 54 (19.29%)                    | 0.0381  |
| Atrial fibrillation                                 | 527 (30.48%)             | 433 (29.88%)                   | 94 (33.57%)                    | 0.2198  |
| Classification of stroke etiologic subtypes (TOAST) |                          |                                |                                |         |
| Large artery                                        | 578 (33.43%)             | 479 (33.06%)                   | 99 (35.36%)                    | 0.4552  |
| Cardioembolic                                       | 563 (32.56%)             | 469 (32.37%)                   | 94 (33.57%)                    | 0.6938  |
| Lacunar stroke                                      | 153 (8.85%)              | 129 (8.90%)                    | 24 (8.57%)                     | 0.8582  |
| Other determined etiology                           | 43 (2.49%)               | 40 (2.76%)                     | 3 (1.07%)                      | 0.0966  |
| Undetermined etiology                               | 392 (22.67%)             | 332 (22.91%)                   | 60 (21.43%)                    | 0.5872  |
| Hospitalization in stroke unit                      | 620 (35.86%)             | 546 (37.68%)                   | 74 (26.43%)                    | 0.0003  |

**Table 1: Baseline characteristics of patients with ischemic stroke (incident and recurrent) hospitalized in Nice University Hospital from 2007 to 2011.**

|                                                          | Mean  | SD    | Minimum | Quartile 1 | Median | Quartile 3 | Maximum |
|----------------------------------------------------------|-------|-------|---------|------------|--------|------------|---------|
| Ozone daily 8-hours average ( $\mu\text{g}/\text{m}^3$ ) | 80.74 | 31.78 | 4.63    | 54.75      | 84.38  | 105.38     | 157.27  |
| Ozone daily 1-hour maximum ( $\mu\text{g}/\text{m}^3$ )  | 92.37 | 31.32 | 7.00    | 69.00      | 94.00  | 115.00     | 197.00  |
| Ozone 24-hours average ( $\mu\text{g}/\text{m}^3$ )      | 52.20 | 22.89 | 4.00    | 32.58      | 53.29  | 69.02      | 111.13  |
| PM10 ( $\mu\text{g}/\text{m}^3$ )                        | 28.48 | 9.81  | 1.00    | 22.00      | 28.00  | 34.00      | 74.00   |
| NO <sub>2</sub> ( $\mu\text{g}/\text{m}^3$ )             | 26.22 | 8.69  | 3.00    | 20.00      | 25.00  | 32.00      | 59.00   |
| SO <sub>2</sub> ( $\mu\text{g}/\text{m}^3$ )             | 1.23  | 1.18  | 0.00    | 0.00       | 1.00   | 2.00       | 10.00   |
| Minimum temperature ( $^{\circ}\text{C}$ )               | 13.02 | 5.98  | -1.60   | 7.80       | 12.90  | 18.20      | 25.90   |
| Maximum humidity (%)                                     | 81.40 | 9.07  | 40.00   | 76.00      | 83.00  | 88.00      | 97.00   |

**Table 2: Distribution of air pollution concentrations and meteorological parameters in Nice (France) between 2007 to 2012.**

|       |             |             |        | All ischemic stroke (n=1729) |                  |        | Recurrent stroke (n=280) |                  |        | Large artery stroke (n=578) |                  |       |
|-------|-------------|-------------|--------|------------------------------|------------------|--------|--------------------------|------------------|--------|-----------------------------|------------------|-------|
|       |             |             |        | Ora                          | 95% IC           | p      | Ora                      | 95% IC           | p      | Ora                         | 95% IC           | p     |
| Ozone | D-1         | 8h average  |        | 0.9917                       | 0.9584 to 1.0261 | 0.633  | 1.0899                   | 1.0009 to 1.1867 | 0.047  | 0.9697                      | 0.9119 to 1.0310 | 0.326 |
|       |             | 1h maximum  |        | 0.9957                       | 0.9644 to 1.0281 | 0.795  | 1.0641                   | 0.9824 to 1.1527 | 0.127  | 0.9881                      | 0.9334 to 1.0460 | 0.682 |
|       |             | 24h average |        | 1.0036                       | 0.9578 to 1.0517 | 0.877  | 1.0793                   | 0.9616 to 1.2115 | 0.195  | 0.9983                      | 0.9190 to 1.0843 | 0.968 |
|       | D-2         | 8h average  |        | 0.9976                       | 0.9657 to 1.0306 | 0.888  | 1.0957                   | 1.0086 to 1.1903 | 0.030  | 0.9903                      | 0.9347 to 1.0491 | 0.741 |
|       |             | 1h maximum  |        | 1.0040                       | 0.9738 to 1.0351 | 0.795  | 1.0955                   | 1.0144 to 1.1831 | 0.020  | 0.9979                      | 0.9457 to 1.0529 | 0.940 |
|       |             | 24h average |        | 1.0015                       | 0.9598 to 1.0451 | 0.942  | 1.0638                   | 0.9587 to 1.1804 | 0.244  | 1.0097                      | 0.9365 to 1.0885 | 0.801 |
|       | D-3         | 8h average  |        | 0.9987                       | 0.9670 to 1.0314 | 0.939  | 1.0601                   | 0.9784 to 1.1487 | 0.154  | 1.0261                      | 0.9703 to 1.0852 | 0.366 |
|       |             | 1h maximum  |        | 0.9968                       | 0.9671 to 1.0273 | 0.836  | 1.0380                   | 0.9635 to 1.1184 | 0.326  | 1.0254                      | 0.9728 to 1.0808 | 0.349 |
|       |             | 24h average |        | 1.0046                       | 0.9644 to 1.0466 | 0.822  | 1.0838                   | 0.9788 to 1.2000 | 0.122  | 1.0519                      | 0.9802 to 1.1289 | 0.160 |
| D-4   | 8h average  |             | 1.0067 | 0.9751 to 1.0393             | 0.681            | 1.0169 | 0.9395 to 1.1006         | 0.678            | 1.0359 | 0.9808 to 1.0941            | 0.205            |       |
|       | 1h maximum  |             | 0.9978 | 0.9684 to 1.0280             | 0.887            | 1.0038 | 0.9321 to 1.0811         | 0.918            | 1.0290 | 0.9777 to 1.0829            | 0.272            |       |
|       | 24h average |             | 1.0114 | 0.9711 to 1.0534             | 0.583            | 1.0248 | 0.9260 to 1.1342         | 0.635            | 1.0787 | 1.0065 to 1.1561            | 0.032            |       |
| PM10  | D-1         |             | 1.0143 | 0.9518 to 1.0806             | 0.659            | 1.0041 | 0.5586 to 1.7995         | 0.989            | 1.0347 | 0.9282 to 1.1527            | 0.536            |       |
|       | D-2         |             | 0.9861 | 0.9238 to 1.0523             | 0.674            | 0.9518 | 0.8106 to 1.1167         | 0.545            | 0.9350 | 0.8349 to 1.0464            | 0.242            |       |
|       | D-3         |             | 0.9788 | 0.9203 to 1.0405             | 0.493            | 1.0047 | 0.8532 to 1.182          | 0.955            | 0.9436 | 0.8475 to 1.0501            | 0.288            |       |
|       | D-4         |             | 0.9780 | 0.9202 to 1.0391             | 0.473            | 0.9911 | 0.8520 to 1.152          | 0.908            | 0.9544 | 0.8572 to 1.0620            | 0.392            |       |
| NO2   | D-1         |             | 1.0307 | 0.9367 to 1.1336             | 0.533            | 0.8960 | 0.7689 to 1.0434         | 0.158            | 1.0293 | 0.8699 to 1.2169            | 0.735            |       |
|       | D-2         |             | 0.9931 | 0.9029 to 1.0918             | 0.887            | 0.9427 | 0.7403 to 1.1991         | 0.631            | 1.0494 | 0.8894 to 1.2372            | 0.565            |       |
|       | D-3         |             | 0.9462 | 0.8607 to 1.0396             | 0.250            | 1.1262 | 0.8767 to 1.4449         | 0.349            | 0.9147 | 0.7743 to 1.0796            | 0.292            |       |
|       | D-4         |             | 0.9462 | 0.8607 to 1.0396             | 0.250            | 0.8931 | 0.7047 to 1.1306         | 0.348            | 0.9147 | 0.7743 to 1.0796            | 0.292            |       |
| SO2   | D-1         |             | 1.0069 | 0.5986 to 1.6893             | 0.979            | 0.653  | 0.164 to 2.5822          | 0.544            | 1.0789 | 0.4507 to 2.5712            | 0.864            |       |
|       | D-2         |             | 0.8763 | 0.5138 to 1.4905             | 0.626            | 0.8916 | 0.2525 to 3.1284         | 0.858            | 1.1784 | 0.4790 to 2.8858            | 0.719            |       |
|       | D-3         |             | 1.2539 | 0.7405 to 2.1174             | 0.397            | 0.7231 | 0.1983 to 2.6188         | 0.622            | 0.9351 | 0.3630 to 2.3973            | 0.889            |       |
|       | D-4         |             | 1.4852 | 0.8956 to 2.4567             | 0.123            | 1.3587 | 0.3735 to 4.9101         | 0.640            | 1.6564 | 0.7140 to 3.8260            | 0.237            |       |

**Table 3: Adjusted odds ratios between ischemic stroke and outdoor pollutants exposure for an increase of 10 µg/m<sup>3</sup> in Nice (France) between 2007 to 2011.**

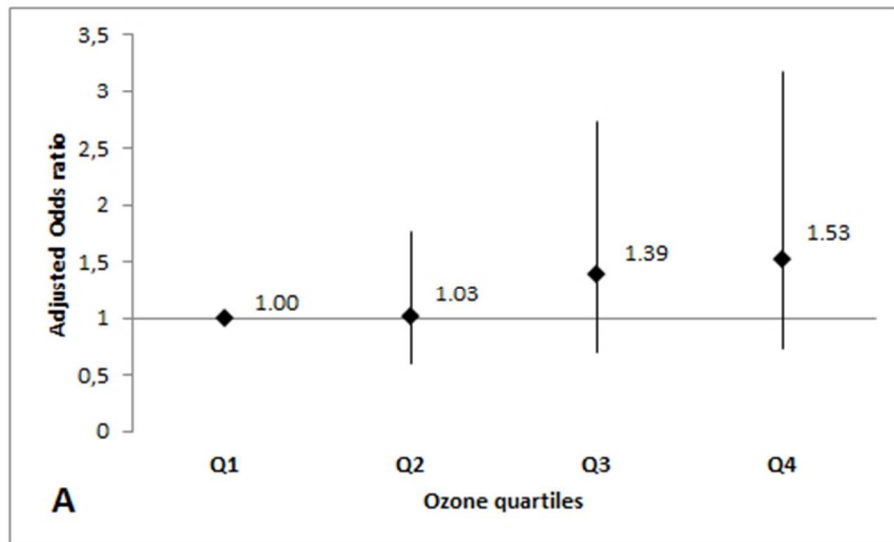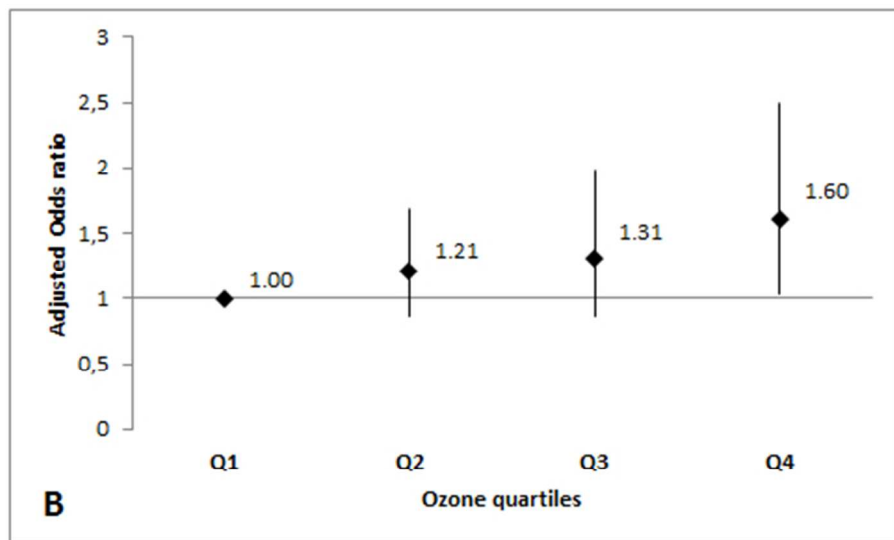

Dose relationship between ozone and ischemic stroke events (1A Recurrent ischemic stroke subgroup, 1B Large artery ischemic stroke subgroup).  
45x54mm (300 x 300 DPI)

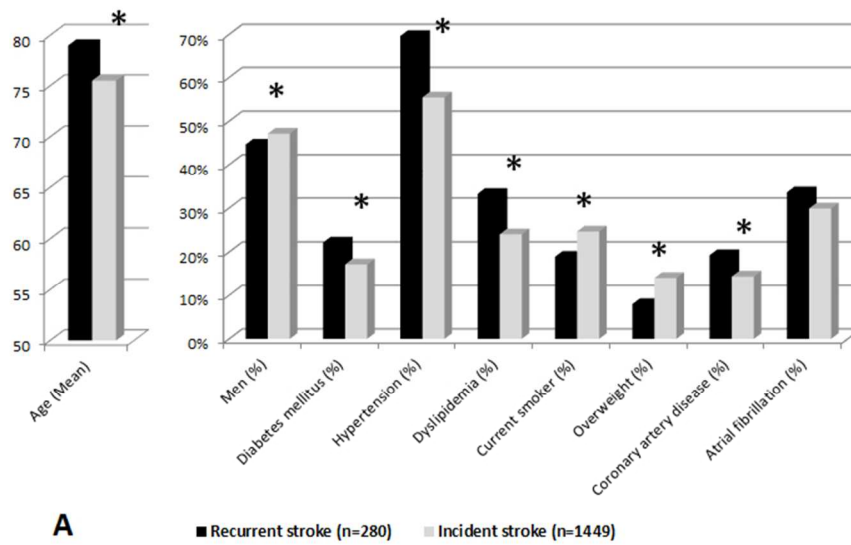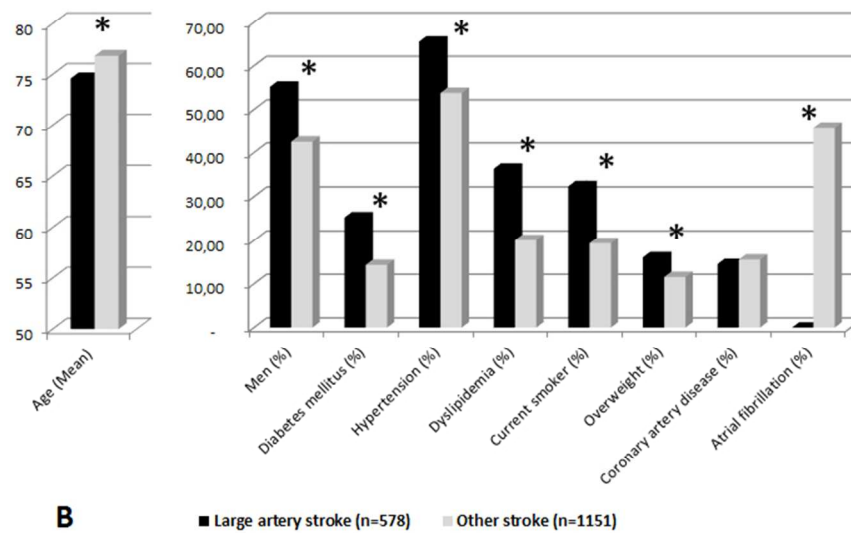

Baseline characteristics according recurrent stroke subgroup (A) and large artery stroke subgroup (B) (\*: p<.05).

62x81mm (300 x 300 DPI)



|                       | Ozone (8h average) | Ozone (1h maximum) | Ozone (24h average) | PM10   | NO2    | SO2    | Temperature (minimum) | Humidity (Maximum) |
|-----------------------|--------------------|--------------------|---------------------|--------|--------|--------|-----------------------|--------------------|
| Ozone (8h average)    | 1.000              |                    |                     |        |        |        |                       |                    |
| Ozone (1h maximum)    | 0.980              | 1.000              |                     |        |        |        |                       |                    |
| Ozone (24h average)   | 0.954              | 0.927              | 1.000               |        |        |        |                       |                    |
| PM10                  | 0.100              | 0.140              | 0.009               | 1.000  |        |        |                       |                    |
| NO2                   | -0.472             | -0.421             | -0.538              | 0.251  | 1.000  |        |                       |                    |
| SO2                   | -0.075             | -0.068             | -0.069              | 0.109  | 0.148  | 1.000  |                       |                    |
| Temperature (minimum) | 0.680              | 0.672              | 0.670               | 0.094  | -0.535 | -0.096 | 1.000                 |                    |
| Humidity (maximum)    | -0.068             | -0.072             | -0.099              | -0.064 | -0.122 | -0.010 | 0.085                 | 1.000              |

**Data supplement Table I: Spearman correlation between air pollutant level and meteorological variables.**
